1 **bHLH heterodimer complex variations shape meristems in *Arabidopsis thaliana* by**  
2 **affecting target gene specificity**

3

4 Eliana Mor<sup>1,2,#</sup>, Markéta Pernisová<sup>3,4,6,#</sup>, Max Minne<sup>1,2</sup>, Guillaume Cerutti<sup>3</sup>, Dagmar Ripper<sup>5</sup>,  
5 Jonah Nolf<sup>1,2</sup>, Jennifer Andres<sup>6</sup>, Laura Ragni<sup>5</sup>, Matias D. Zurbriggen<sup>6,\*</sup>, Bert De Rybel<sup>1,2,\*</sup>  
6 and Teva Vernoux<sup>3,\*</sup>

7

8 ORCID IDs: EM: 0000-0002-4743-8865, MP: 0000-0002-5803-2879, MM: 0000-0003-3089-  
9 2284, JN: 0000-0002-4393-0852, LR: 0000-0002-3651-8966, MZ: 0000-0002-3523-2907,  
10 BDR: 0000-0002-9551-042X, TV: 0000-0002-8257-4088

11

12 <sup>1</sup> Ghent University, Department of Plant Biotechnology and Bioinformatics, Technologiepark  
13 71, 9052 Ghent, Belgium

14 <sup>2</sup> VIB Centre for Plant Systems Biology, Technologiepark 71, 9052 Ghent, Belgium

15 <sup>3</sup> Laboratoire Reproduction et Développement des Plantes, Univ Lyon, ENS de Lyon, CNRS,  
16 INRAE, INRIA, 69342 Lyon, France

17 <sup>4</sup> Functional Genomics and Proteomics, National Centre for Biomolecular Research, Faculty  
18 of Science, and Plant Sciences Core Facility, Mendel Centre for Plant Genomics and  
19 Proteomics, Central European Institute of Technology (CEITEC), Masaryk University, 62500  
20 Brno, Czechia

21 <sup>5</sup> ZMBP-Center for Plant Molecular Biology, University of Tübingen, Auf der Morgenstelle  
22 32, D-72076 Tübingen, Germany

23 <sup>6</sup> Institute of Synthetic Biology and CEPLAS, Heinrich-Heine-Universität Düsseldorf,  
24 Universitätsstrasse 1, 40225 Düsseldorf, Germany

25

26 # These authors contributed equally to this work

27 \* Corresponding authors

28 **Short title:** bHLH heterodimers shape plant meristems

29

30 The authors responsible for distribution of materials integral to the findings presented in this  
31 article in accordance with the policy described in the Instructions for Authors

32 (www.plantcell.org) are: Matias D. Zurbriggen ([matias.zurbriggen@uni-duesseldorf.de](mailto:matias.zurbriggen@uni-duesseldorf.de)), Bert  
33 De Rybel ([beryb@psb.vib-ugent.be](mailto:beryb@psb.vib-ugent.be)) and Teva Vernoux ([teva.vernoux@ens-lyon.fr](mailto:teva.vernoux@ens-lyon.fr)).

34 **ABSTRACT**

35

36 The main regions of cell proliferation in plants are the root and shoot apical meristems during  
37 primary growth and the vascular cambia as lateral meristems during secondary thickening. A  
38 number of unique regulators have been described in each of these meristems, suggesting that  
39 these different meristems might have independently evolved dedicated transcriptional  
40 networks to balance cell proliferation. Here, we show that the basic Helix Loop Helix (bHLH)  
41 transcription factor complexes formed by TARGET OF MONOPTEROS5 (TMO5),  
42 LONESOME HIGHWAY (LHW) and their close homologs are broadly expressed throughout  
43 plant development and operate as general regulators of cell proliferation in all meristems. Yet,  
44 genetic and expression analyses indicate that these complexes have specific functions in  
45 distinct meristems mediated by heterodimer complex variations between members of the  
46 TMO5 and LHW subclades. We determine that this is primarily due to their expression  
47 domains limiting the possible combinations of heterodimer complexes within a certain  
48 meristem, and to a certain extent to the absence of some members in a given meristem. We  
49 further demonstrate target gene specificity for heterodimer complexes, suggesting that spatial  
50 differences in transcriptional responses through heterodimer diversification allow a common  
51 bHLH heterodimer complex module to contribute to the control of cell proliferation in  
52 multiple meristems.

## 53 INTRODUCTION

54

55 Post-embryonic plant growth and development is driven by the activity of three main pools of  
56 pluripotent stem cells contained in zones called meristems. These are tightly regulated to  
57 divide and differentiate into specific cell types and form new organs. The root apical meristem  
58 (RAM) is located at the growing root tip, laid down during embryogenesis and responsible for  
59 a formation and primary growth of below-ground organs. At the other extremity, an activity  
60 of stem cells in the shoot apical meristem (SAM) is responsible for aerial organ development  
61 (Wang et al., 2018). While the apical meristems (RAM and SAM) give rise to the primary  
62 plant body, plants use the third pool of proliferating cells located in lateral meristems (LM) to  
63 support secondary growth leading to an increase in root and stem girth or thickness (Ragni  
64 and Greb, 2018). These meristems represent vascular and cork cambia (Etchells and Turner,  
65 2010; Serra et al., 2022). Meristem activity is essential for growth and development and thus  
66 needs to be tightly controlled to ensure optimal growth depending on the environmental  
67 conditions and to avoid excessive cell proliferation (Motte et al., 2019).

68 Several key regulators, including transcription factors (TFs), and ligand-receptor complexes  
69 have been identified, which contribute to this intricate regulation of each of these meristem  
70 regions (Shimotohno and Scheres, 2019). For example, the CLAVATA3 (CLV3)-CLV1-  
71 WUSCHEL (WUS) negative feedback loop is the central genetic mechanism that coordinates  
72 stem cell proliferation with differentiation in the SAM. Perturbation of this regulatory  
73 network leads to phenotypes ranging from a loss of the meristem to a massive over-  
74 proliferation of meristematic cells (Clark et al., 1993, 1995; Laux et al., 1996; Gaillochet et  
75 al., 2015). Regulation of the LM that contributes the most to radial growth, called the vascular  
76 cambium, occurs via CLAVATA3-LIKE/ESR-RELATED 41 (CLE41) peptides produced in  
77 the phloem and perceived in the cambium by the PHLOEM INTERCALATED WITH  
78 XYLEM (PXY)/ TDIF RECEPTOR (TDR) receptor. Through activation of the direct targets  
79 of the complex, *WUSCHEL RELATED HOMEBOX 4 (WOX4)* and *WOX14*, this pathway  
80 regulates cell division and vascular patterning (Fisher and Turner, 2007; Suer et al., 2011;  
81 Etchells et al., 2013). In the RAM, the peptide-receptor kinases complex formed by CLE40-  
82 CLV1-ACT DOMAIN REPEAT 4 (ACR4) controls *WOX5* expression and activity, thereby  
83 orchestrating stem cell maintenance and balancing the differentiation activity (Stahl et al.,  
84 2013; Berckmans et al., 2020). The DNA binding with One Finger (DOF)-type TFs have also  
85 been shown to control cell division orientation and proliferation in the vascular cells in the  
86 RAM in a cytokinin dependent manner (Miyashima et al., 2019; Smet et al., 2019). These act

87 downstream of the basic helix-loop-helix (bHLH) TFs complex formed by TARGET OF  
88 MONOPTEROS5 (TMO5) and LONESOME HIGHWAY (LHW) (De Rybel et al., 2013;  
89 Ohashi-Ito et al., 2013a, 2013b, 2014).

90 So far, studies have thus focused on factors that seem to be almost exclusively specific to one  
91 of the three meristem regions. While dedicated regulatory networks are likely required in  
92 different meristems, the alternative possibility remains that we are simply yet to uncover  
93 common factors required to regulate proliferation in all meristems. The TMO5/LHW bHLH  
94 heterodimer complex is a good candidate to function in multiple meristems as individual  
95 members have been shown to be broadly expressed in vascular tissues throughout plant  
96 development (De Rybel et al., 2013; Ohashi-Ito et al., 2013a, 2013b, 2014). Moreover, bHLH  
97 dimers are well suited to allow diversification in functions by using three main parameters:  
98 spatiotemporal expression patterns, DNA binding specificity, and dimerization properties  
99 (Grove et al., 2009). Indeed, bHLH TFs display a variety of expression patterns, where the  
100 overlap can define their sites of actions in space and time (Qian et al., 2021; Hao et al., 2021).  
101 DNA binding specificity is dictated by a highly conserved signature of amino acid motif that  
102 forms the basic DNA binding regions and shows significant variations in the bHLH family  
103 (Massari and Murre, 2000). Finally, specificity in dimerization properties was highlighted as a  
104 determining factor for the majority of bHLH proteins (Grove et al., 2009).

105 TMO5 acts downstream the auxin-dependent transcription factor MONOPTEROS/AUXIN  
106 RESPONSE FACTOR5 (MP/ARF5) (Schlereth et al., 2010). TMO5 has three homologs,  
107 TMO5 LIKE1-3 (T5L1-3), all showing a similar expression pattern restricted to the xylem in  
108 the RAM (De Rybel et al., 2013). Loss-of-function of TMO5 and its closest homolog T5L1  
109 leads to a reduced vascular cell number compared to wild-type (WT) and a monarch  
110 patterning defect with only one pole of phloem and xylem, compared to the diarch WT  
111 phenotype (De Rybel et al., 2013). Higher order mutants enhance the severity of these  
112 phenotypes, suggesting they are redundant family members (De Rybel et al., 2013). Similarly,  
113 LHW also has three homologs, LHW LIKE1-3 (LL1-3). Although LHW and its homologs  
114 have a broader expression pattern in the RAM (Ohashi-Ito and Bergmann, 2007; De Rybel et  
115 al., 2013; Ohashi-Ito et al., 2013a, 2013b), defects in LHW lead to identical phenotypes as the  
116 *tmo5 t5l1* double mutant (De Rybel et al., 2013; Ohashi-Ito et al., 2013a, 2013b). Moreover,  
117 higher order mutants increase the severity of the phenotypes, indicating that their function is  
118 dose-dependent (Ohashi-Ito and Bergmann, 2007; De Rybel et al., 2013). Combined  
119 misexpression of both TMO5 and LHW factors triggers ectopic periclinal and radial cell  
120 divisions throughout the RAM, suggesting that they function as part of an obligate

121 heterodimer complex (Ohashi-Ito and Bergmann, 2007; De Rybel et al., 2013; Ohashi-Ito et  
122 al., 2013a, 2013b; Smet et al., 2019). Indeed, members of the TMO5 and LHW subclades,  
123 which overlap in expression in the young xylem cells of the primary RAM, interact and form  
124 heterodimers (De Rybel et al., 2013; Ohashi-Ito et al., 2013a, 2013b, 2014). The TMO5/LHW  
125 complex directly activates expression of *LONELY GUY3 (LOG3)*, *LOG4* and *BETA-*  
126 *GLUCOSIDASE44* in the xylem cells, leading to higher levels of active cytokinins by  
127 increasing biosynthesis (LOG3/4) and deconjugation (BGLU44) (De Rybel et al., 2014;  
128 Ohashi-Ito et al., 2014; Yang et al., 2021). Cytokinins are thought to diffuse to the  
129 neighbouring procambium and phloem cells where they trigger divisions. This activity is  
130 balanced by CYTOKININ OXIDASE3, which is induced by *SHORT ROOT*, itself a direct  
131 TMO5/LHW target gene (Yang et al., 2021).

132 Here, we show that the TMO5/LHW complex activity is not restricted only to the primary  
133 root meristem region but is more broadly required for normal development of RAM, SAM  
134 and the vascular cambium as LM. The required diversity to control these differently organized  
135 meristems is obtained by differences in expression domains and heterodimer complex  
136 variations between members of the TMO5 and LHW subclades, which lead to target gene  
137 specificity.

138

139

## 140 RESULTS

141

### 142 TMO5/LHW function is not restricted to primary root development

143 To establish if the function of TMO5 and LHW clade members is restricted to the RAM or  
144 whether they play a broader role during plant development, we first explored the effect of  
145 altered heterodimer levels in the SAM and in the vascular cambium during root secondary  
146 growth, using existing higher order mutants (*tmo5 t511* double, *tmo5 t511 t513* triple, and *lhw*  
147 *III* double mutants) (De Rybel et al., 2013; Ohashi-Ito et al., 2013a) and a constitutive  
148 misexpression line (*ProRPS5A::TMO5* x *ProRPS5A::LHW*) (De Rybel et al., 2013) in  
149 comparison to wild type Col-0. Given that vascular cell numbers are not easily quantified in  
150 the SAM and that the capacity of TMO5 and LHW to induce cell division is not limited to  
151 vascular cells (De Rybel et al., 2013), we measured the SAM area as a read-out for a possible  
152 effect on cell proliferation activity. We found significant changes in the SAM area in all the  
153 lines compared to control (**Figure 1 A-E and K**) (see example of SAM surface analysis in  
154 **Supplemental Figure S1A**). The misexpression line, the *tmo5 t511 t513* and *lhw III* mutants  
155 had a smaller SAM while *tmo5 t511* had a slightly but significantly bigger SAM area. Changes  
156 in SAM size were only partial due to changes in cell size (**Figure 1L**) and cell number  
157 (**Supplemental Figure S1B**), indeed suggesting a role of these genes in the regulation of cell  
158 proliferation throughout the SAM which is more complex compared to the RAM. Similar to  
159 the effects observed in the primary RAM, the number of vascular cell files was reduced  
160 during root secondary growth in a dose-dependent manner in the loss-of-function mutant lines  
161 and increased in the misexpression line (**Figure 1 F-J and M**). In summary, these results  
162 suggest that the activity of TMO5/LHW and some of their homologs might not be restricted  
163 only to control cell proliferation in the primary RAM but in other meristems as well.

164

### 165 TMO5/LHW is required and sufficient for root secondary growth

166 Our results suggest that the TMO5/LHW pathway is conserved in function in primary  
167 meristems and during root secondary growth. However, it remains possible that the observed  
168 effects during secondary growth are a consequence of the persistent lack or overexpression of  
169 these factors during primary growth. Thus, to investigate if TMO5 is sufficient to trigger  
170 vascular proliferation during secondary growth specifically, TMO5 was exclusively expressed  
171 during this developmental stage by introducing a dexamethasone (DEX) inducible  
172 *ProRPS5A::TMO5-GR* rescue construct into the *tmo5 t511 t513* triple mutant. When grown on  
173 medium supplemented with 10  $\mu$ M DEX, the *ProRPS5A::TMO5-GR* construct introduced in

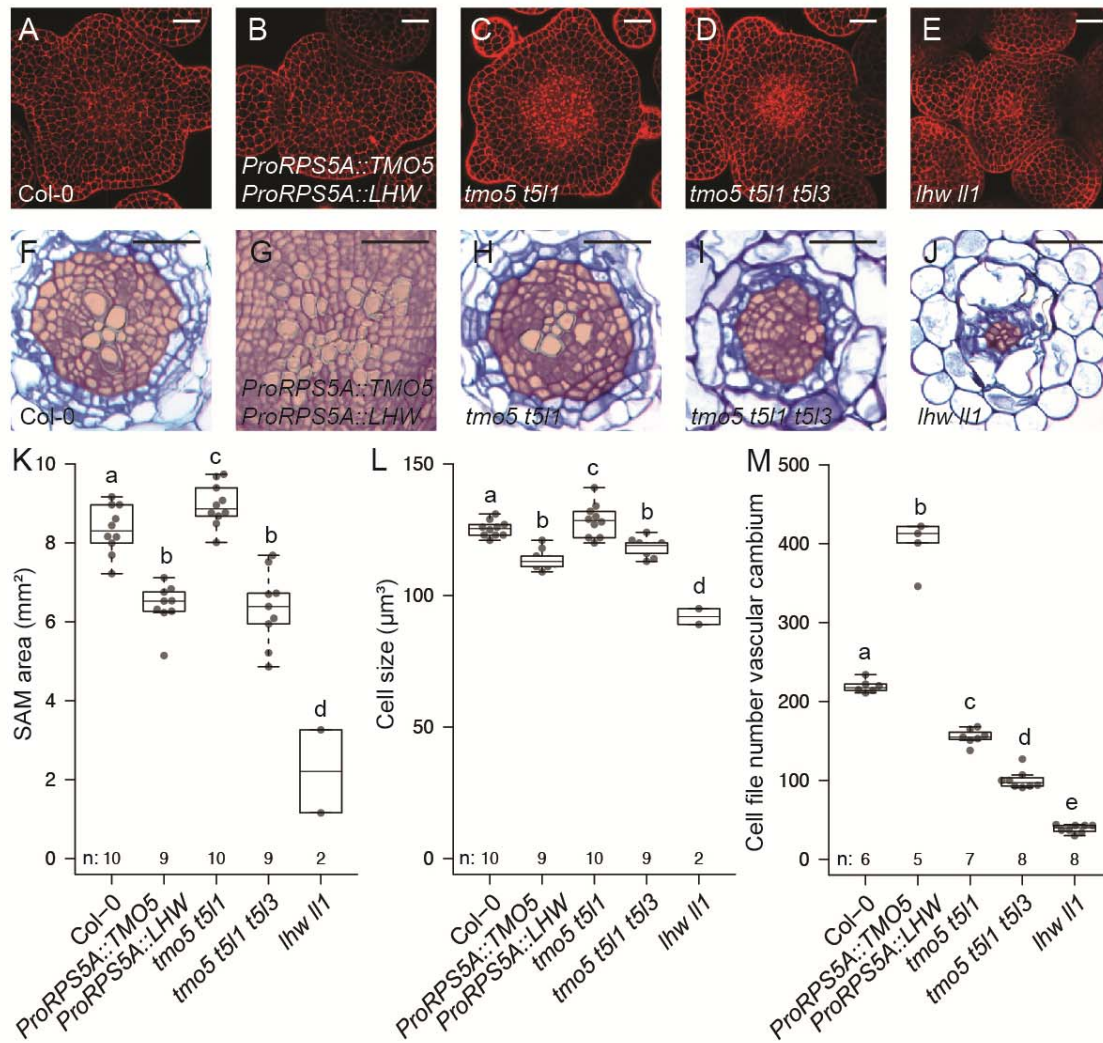

**Figure 1. TMO5/LHW function is not restricted to primary root development.**

Cross sections of shoot apical meristems and roots undergoing secondary growth (uppermost part of the root) of 10-day-old seedlings of (A, F) wild type Col-0, (B, G) *ProRPS5A::TMO5* x *ProRPS5A::LHW*, (C, H) *tmo5 t5l1*, (D, I) *tmo5 t5l1 t5l3* and (E, J) *lhw ll1*. (K) Measurement of shoot apical meristem area and (L) cell size in L1 layer and (M) quantification of vascular cell files (within but excluding the pericycle, outlined red zone in F-J) number of root cross sections. Lowercase letters in charts indicate significantly different groups as determined using a one-way ANOVA with post-hoc Tukey HSD testing ( $p \leq 0.05$ ). Scale bars: (A-E) 20  $\mu\text{m}$ ; (F-J) 100  $\mu\text{m}$ .

174 the triple mutant can rescue the proliferation defect in the *tmo5 t5l1 t5l3* triple mutant to an  
 175 almost non-phenotypical (*t5l1 t5l3* double mutant) situation (Figure 2 A, B and I) (De Rybel  
 176 et al., 2013). This inducible rescue system was next used as a tool to investigate if TMO5  
 177 expression during root secondary growth is sufficient to trigger vascular cell proliferation.  
 178 *tmo5 t5l1 t5l3* mutants with and without the inducible *ProRPS5A::TMO5-GR* rescue construct  
 179 were grown on mock medium for 5 days and then transferred onto inducing medium  
 180 supplemented with 10  $\mu\text{M}$  DEX for another 5 days. Again, the number of vascular cell files in

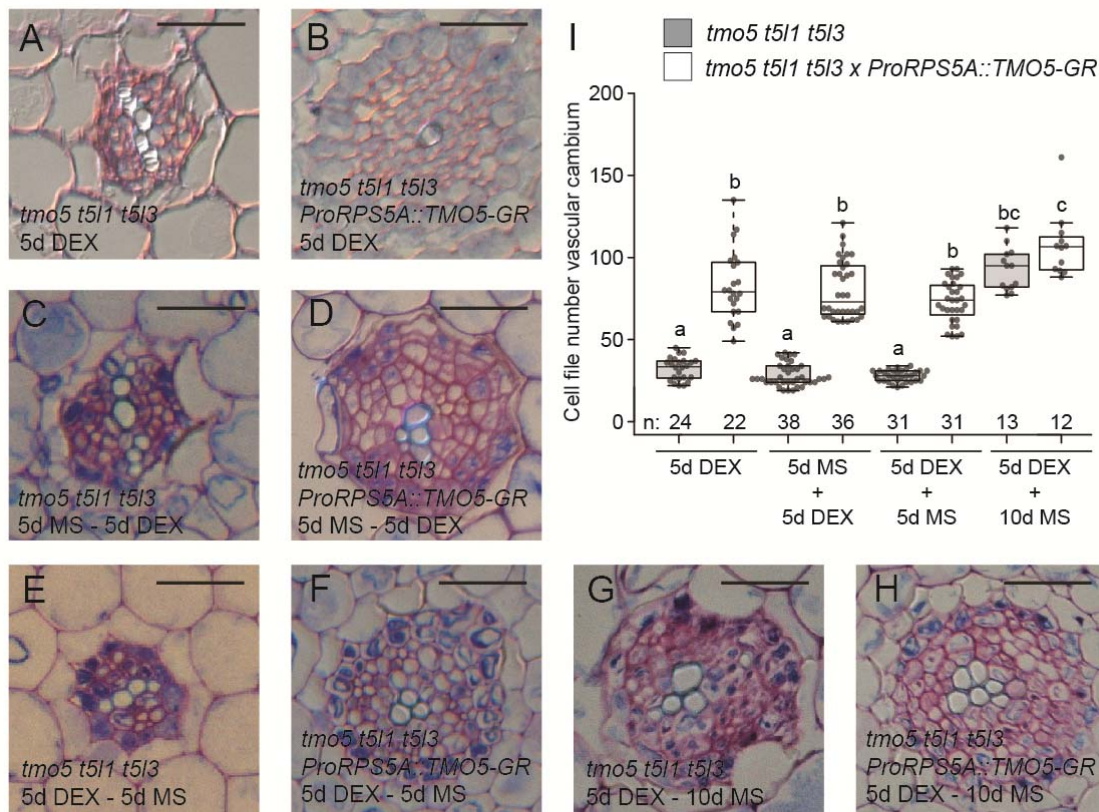

**Figure 2. TMO5/LHW is required and sufficient for root secondary growth.**

Cross sections of roots undergoing secondary growth (upper most part of the root) of *tmo5 t5l1 t5l3* and *tmo5 t5l1 t5l3* with *ProRPS5A::TMO5-GR* seedlings grown either (A, B) 5 days on medium supplemented with 10  $\mu$ M dexamethasone (DEX), (C, D) 5 days on mock medium (MS) and then transferred for additional 5 days to DEX; (E, F) 5 days on DEX and then transferred for 5 or (G, H) 10 days to MS medium. (I) Quantification shows vascular cell files number of cross sections. Lowercase letters in chart indicate significantly different groups as determined using a one-way ANOVA with post-hoc Tukey HSD testing ( $p \leq 0.05$ ). Scale bars: 100  $\mu$ m.

181 the root undergoing secondary growth was quantified. *tmo5 t5l1 t5l3* mutants carrying the  
 182 *ProRPS5A::TMO5-GR* rescue construct showed a significant increase in vascular cells  
 183 numbers compared with the triple mutant without the rescue construct (Figure 2 C, D and I).  
 184 This indicates that induction of TMO5 specifically during secondary growth is sufficient to  
 185 trigger periclinal division leading to radial expansion. Next, we made use of the same rescue  
 186 system to investigate if the TMO5/LHW pathway is required for secondary growth. Seedlings  
 187 were first grown on inducible DEX medium for 5 days and then transferred onto mock  
 188 medium for an additional 10 days. This timing was chosen as the effect of the initial 5 days  
 189 DEX treatment persists for several days after transfer to mock medium (Figure 2 E, F and I).  
 190 After the transfer to mock medium and an additional 10 days of growth, no significant  
 191 difference could be observed between the number of vascular cell files of the triple mutant



192 compared to the triple mutant carrying the *ProRPS5A::TMO5-GR* rescue construct (**Figure 2**  
193 **G-I**), indicating that TMO5 presence during primary growth is sufficient to initiate secondary  
194 growth but not to maintain it. These results therefore suggest that the TMO5/LHW pathway is  
195 both sufficient and required to allow vascular proliferation during root secondary growth.

196

### 197 **TMO5 and LHW clade members show overlapping expression in distinct meristems**

198 Although the redundant role of both TMO5 and LHW subclade members in vascular  
199 proliferation of the primary RAM has been described in detail, some of the observed  
200 phenotypes associated with higher order mutants of these factors are not restricted to the  
201 primary root meristem (De Rybel et al., 2013; Ohashi-Ito et al., 2013a, 2013b). Moreover,  
202 there are some indications that TMO5 and LHW bHLH subclade members are expressed in  
203 aerial tissues as well (Ohashi-Ito et al., 2013a), consistently with the effect on SAM size  
204 observed in mutants and in the TMO5/LHW misexpression line (**Figure 1 A-E, K**).

205 In order to first provide a detailed overview of the localisation of these factors in *Arabidopsis*  
206 *thaliana*, we generated promoter-nuclear triple GFP-GUS fusion constructs for all members  
207 and analysed their expression domains in the RAM, in the vascular cambium during root  
208 secondary growth and in the SAM. As previously reported (De Rybel et al., 2013), *TMO5*  
209 clade members show overlapping expression in the young xylem cells of the RAM (**Figure 3**  
210 **A-D**). Similarly, during secondary growth in the root, *TMO5* clade members showed  
211 expression in developing and differentiating xylem cells. *T5L1* and *T5L3* were also detected  
212 in some cells of the vascular cambium (**Figure 3 E-H**). In the SAM region, only *TMO5*  
213 showed a specific provascular-associated expression (**Figure 3I**). *T5L1* was not detected in  
214 the SAM (**Figure 3J**) but did show expression in a few cell files in the vascular tissue below  
215 the SAM (**Supplemental Figure S2A**). *T5L2* was found to be highly expressed in the L1  
216 layer and at much lower levels in other cells of the SAM (**Figure 3K**). *T5L2* was also largely  
217 excluded from the centre of the meristem. *T5L3* was expressed broadly in the SAM both in  
218 the L1 layer and in the internal tissues, except for the central part of the SAM where it was  
219 completely absent (**Figure 3L**).

220 Compared to *TMO5* clade members in the RAM, members of the *LHW* clade showed a  
221 broader expression domain in vascular tissues (**Figure 4 A-D**), and in the case of *LHW* and  
222 *LL1*, this pattern was similar to previously published lines (**Figure 4 A, B**) (De Rybel et al.,  
223 2013). Also, during secondary growth, LHW, LL1 and LL3 clade members showed  
224 expression in xylem and cambium tissues, while LL2 was only detected in the xylem (**Figure**  
225 **4 E-H**). A broad expression domain was observed in the SAM for both *LHW* and *LL1* (**Figure**

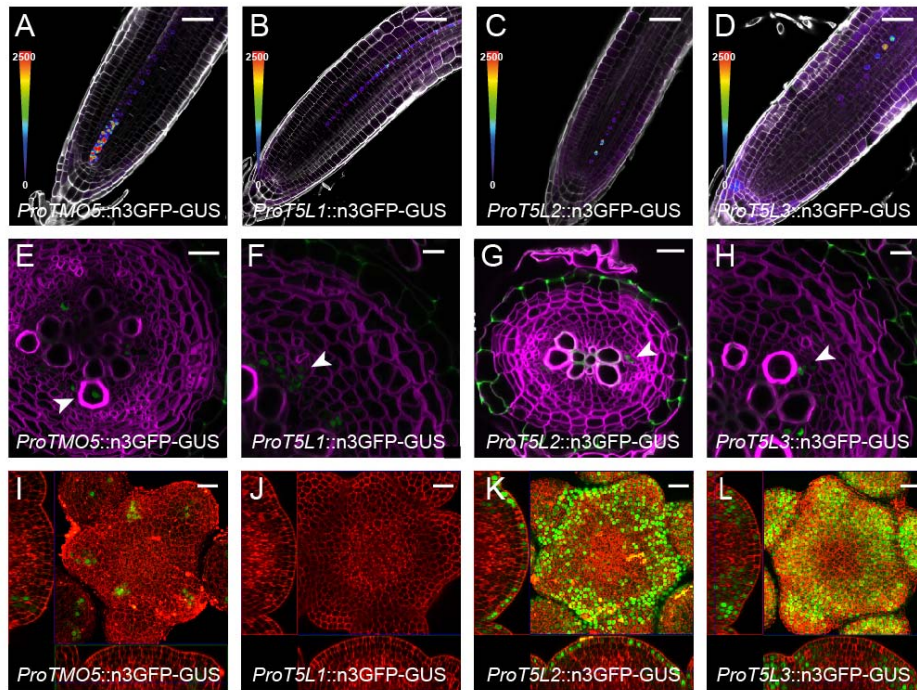

**Figure 3. TMO5 clade members show specific expression patterns in the meristems.** Promoter-reporter lines were used to analyse the expression pattern of ProTMO5, ProT5L1, ProT5L2, and ProT5L3 in (A-D) longitudinal sections of 5-day-old root apical meristem; (E-H) cross sections of 20-day-old roots displaying secondary growth; (I-L) shoot apical meristems. Central squares in I, K and L represent maximum intensity projection. Scale bars: (A-D) 50  $\mu$ m; (E, F, H) 10  $\mu$ m; (G, I-L) 20  $\mu$ m. Arrowheads indicate expression.

226 **4 I, J**), but *LHW* was absent specifically from the L2 layer while *LL1* was more specifically  
227 expressed in organ primordia in the peripheral zone. No expression was detected in the SAM  
228 for *LL2* and *LL3* (**Figure 4 K, L**) and, similarly to *T5L1*, *LL3* showed expression within the  
229 vasculature below the SAM (**Supplemental Figure S2B**). Taken together, our results show  
230 that the *TMO5* and *LHW* clade members are expressed in distinct meristematic regions,  
231 consistent with a general meristematic function for these factors throughout development.  
232 Additionally, some of these TFs show prominent expression only in one of the meristems,  
233 while being absent in others. These results thus argue for a general function of the TMO5-  
234 T5Ls/LHW-LLs factors in all the meristems, but with some expression specificity that could  
235 result in alternative TMO5-T5Ls/LHW-LLs combinations in the different meristems.

236

### 237 **Single mutant analysis reveals functional specificity in TMO5 and LHW clade members**

238 Despite the fact that TMO5 and LHW homologs have a clear redundant role in primary root  
239 vascular proliferation, the observed specificity in expression patterns in other meristems  
240 suggest that there might be some functional specificity amongst the clade members. Indeed,  
241 TMO5, T5L1 and LHW are reported to be the most prominent factors driving vascular

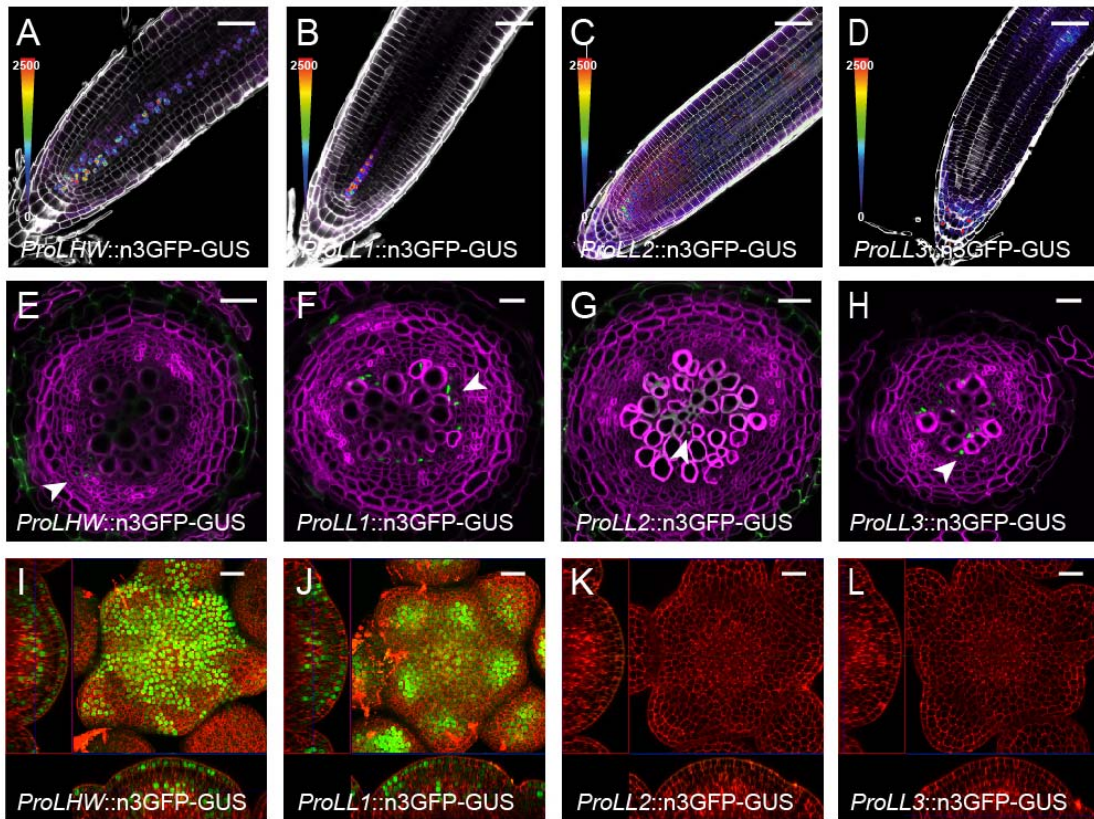

**Figure 4. LHW clad members show overlapping expressions in the meristems.** Promoter-reporter lines were used to analyse the expression pattern of ProLHW, ProLL1, ProLL2, and ProLL3 in (A-D) longitudinal sections of 5-day-old root apical meristem; (E-H) cross sections of 20-day-old roots displaying secondary growth; and in (I-L) shoot apical meristems. Central squares in I and J represent maximum intensity projection. Scale bars: (A-D) 50  $\mu$ m; (E-L) 20  $\mu$ m. Arrowheads indicate expression.

242 proliferation in the primary root meristem, while the other members might be less important  
243 for this specific developmental process (De Rybel et al., 2013; Ohashi-Ito et al., 2014). To get  
244 a global understanding of the functional specificity among the TMO5 and LHW clad  
245 members throughout plant development, we next analysed single mutants for discernible  
246 phenotypes in the three meristems in comparison to WT plants. In the RAM, all single  
247 mutants with the exception of *t5l2* showed a significant reduction in cell files number (**Figure**  
248 **5A, Supplemental Figure S3 A-I**). Still, a clear distinction within the subclades was

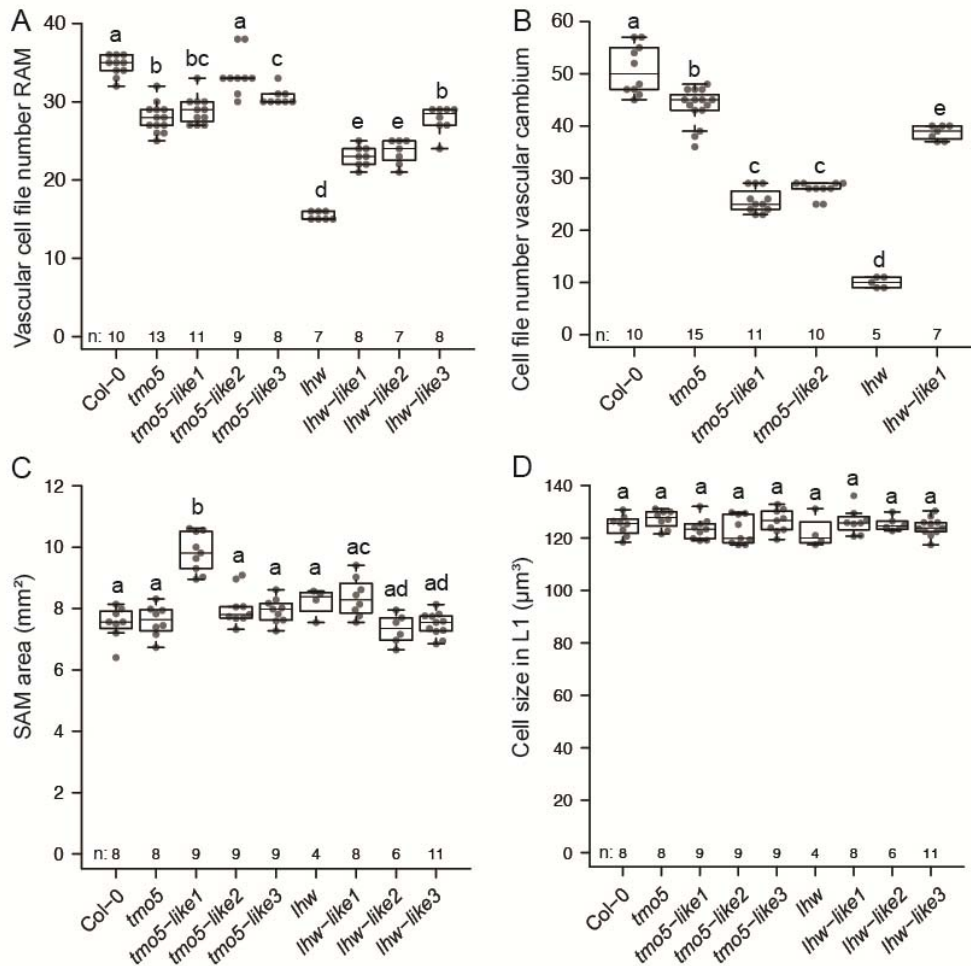

**Figure 5. Single mutant analysis reveals functional specificity in TMO5 and LHW clade members.**

Quantification of Col-0, *tmo5*, *t5l1*, *t5l2*, *t5l3*, *lhw*, *ll1*, *ll2* and *ll3* for vascular cell files number of cross sections (A) of root apical meristems, (B) of root undergoing secondary growth, (C) measurement of shoot apical meristem area and (D) cell size in L1 layer. Asterisks indicate endodermis. Lowercase letters in charts indicate significantly different groups as determined using a one-way ANOVA with

249 observed in the relative contributions to this phenotype, with *tmo5*, *t5l1*, *t5l3* and *lhw* showing  
 250 the strongest reduction in the number of vascular cell files. It is worth noting that *lhw* is the  
 251 only single mutant with a monarch instead of the normal diarch vascular architecture (Ohashi-  
 252 Ito and Bergmann, 2007), explaining the more pronounced phenotype. Similar observations  
 253 were made in roots initiating secondary growth, with *tmo5*, *t5l1*, *t5l2*, *lhw*, *ll1* analysed  
 254 mutants showing a significant reduction in cell file numbers, but the relative contributions of  
 255 the factors were different. Indeed, *t5l1*, *t5l2* and *lhw* seem to be the major players in the

256 establishment of secondary growth (**Figure 5B, Supplemental Figure S3 J-O**). Additionally,  
257 the SAM area was significantly larger in *t5l1* and *l1l* mutants as well as the number of  
258 meristem cells (**Figure 5C, Supplemental Figure S3 P-Y**). Cell size was not significantly  
259 affected in single mutants, confirming an effect on cell proliferation in the SAM (**Figure 5D**).  
260 Additional shoot phenotypes were found in the inflorescence stems of mutants. For example,  
261 *tmo5* and *t5l1* started initiating siliques before the last inflorescence branch (**Supplemental**  
262 **Figure S4A**) suggesting a deviation in lateral organ/structure identity determination in the  
263 SAM, whereas *t5l3* produced inflorescence branches incapable of upright growth  
264 (**Supplemental Figure S4B**). Finally, inflorescence growth of the *lhw* mutant was slower,  
265 and much more affected in *lhw l1l* double mutants (**Supplemental Figure S4A**). In summary,  
266 these results show that, while a general effect on cell proliferation is observed, the effect of  
267 single mutations in the members of *TMO5* and *LHW* subclades differs depending on the  
268 meristem considered, suggesting a level of functional and tissue specificity with an opposite  
269 trend in root and shoot.

270

#### 271 **Variations in bHLH heterodimer complexes show distinct phenotypic outputs**

272 Although the observed tissue- and organ-specific expression of the *TMO5* and *LHW* clade  
273 members could account for the phenotypic differences in the single mutants, there was no  
274 perfect correlation, suggesting that there might be other layers of functional regulation. Given  
275 that *TMO5* and *LHW* clade members form obligate heterodimer complexes (De Rybel et al.,  
276 2013; Ohashi-Ito et al., 2014), we next questioned if such functional specificity could be  
277 caused by the particular heterodimer complex that is formed. Although *TMO5* and *LHW*  
278 interaction partners can likely all interact with each other (De Rybel et al., 2013; Ohashi-Ito et  
279 al., 2014), this indeed does not mean that these combinations would lead to a functional  
280 bHLH complex. We thus combined several individual overexpression lines by crossing  
281 *TMO5*-clade members with *LHW*-clade members and analysed the effect in the RAM and the  
282 SAM (**Figure 6**). Compared to the wild type, different combinations resulted in a quantitative  
283 difference in the number of root vascular cell files with *TMO5/LHW* as the most potent  
284 combination and *T5L2/LHW* not showing any significant difference (**Figure 6 A-E and K**).  
285 Strong phenotypical effects were observed in the shoot as previously reported for  
286 *TMO5/LHW* (Vera-Sirera et al., 2015), including reduced stem height, curly, hyponastic, or  
287 jagged leaves (**Supplemental Figure S5**). In the SAM, our analysis suggests that the resulting  
288 phenotypes and their severity show a tendency to be dependent on the combination of *TMO5*-  
289 and *LHW*-clade members as in the root but the high variability of the parameters allows firm

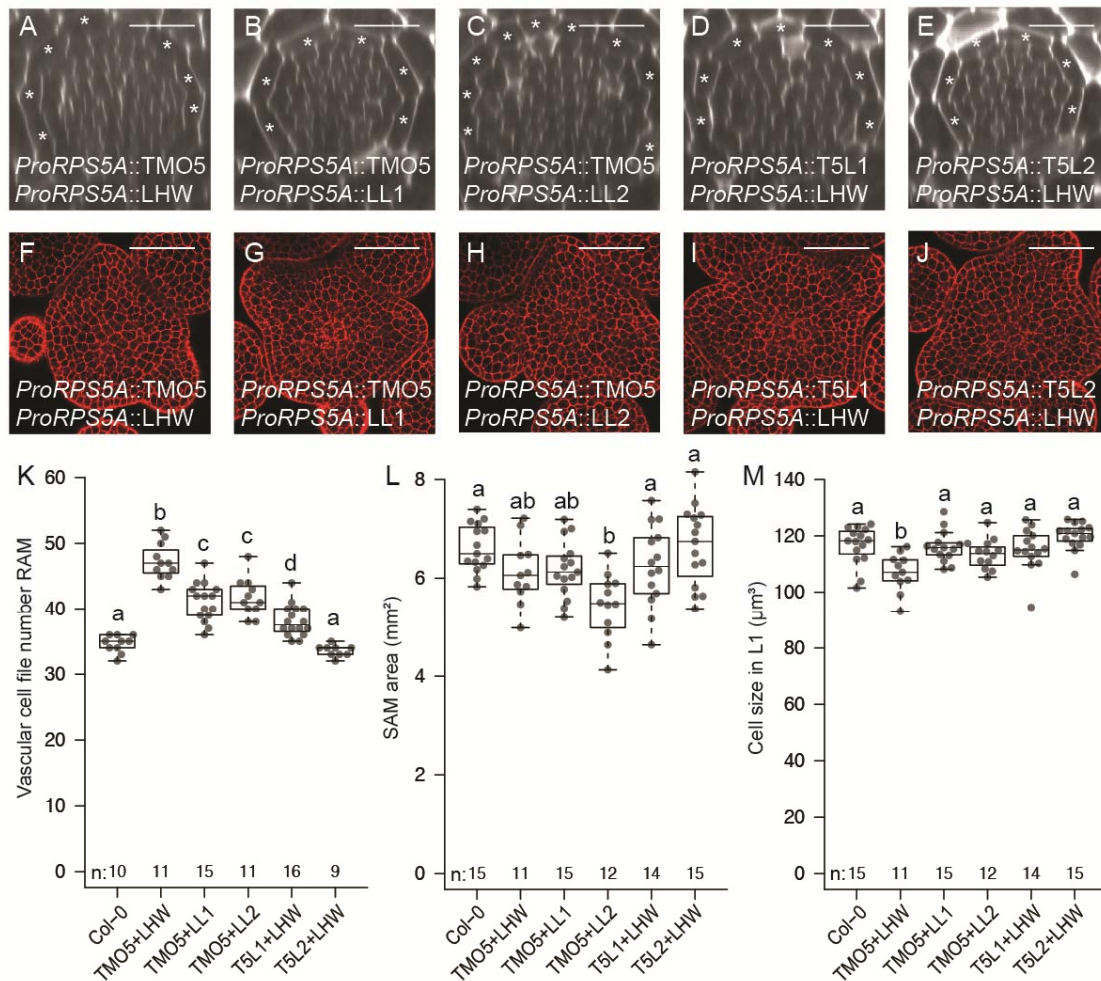

290 conclusions only for TMO5/LL2 with a reduced SAM area (**Figure 6 F-J and L**) and SAM  
 291 cell number (**Supplemental Figure S6**), and TMO5/LHW with a reduced cell size (**Figure**  
 292 **1M and 6M**).

293 In summary, these experiments show that even when TMO5 and LHW clade members are  
 294 ectopically expressed together, they do not always lead to the same phenotype. Thus, TMO5-  
 295 and LHW-clade heterodimer complex activity is not solely determined via the observed  
 296 differential expression domains but also likely because of variations in the complexes or in  
 297 the activity of the complexes which are being formed.

298

## 299 Variations in bHLH heterodimer complexes affect target gene specificity

300 TMO5/LHW complexes induce vascular cell proliferation in the root apical meristem via  
301 induction of cytokinin biosynthesis through direct binding to the promoter regions of *LOG3*  
302 and *LOG4* (De Rybel et al., 2014; Ohashi-Ito et al., 2014; Smet et al., 2019). These enzymes  
303 catalyse the final step of cytokinin biosynthesis (Kurakawa et al., 2007; Kuroha et al., 2009).  
304 We therefore set to explore the functional differences in gene regulatory potential between the  
305 different heterodimers that can be formed. To achieve this, we implemented a mid-throughput  
306 protoplast-based quantitative gene expression system that enables covering all possible  
307 combinations, obtaining quantitative data and reducing interferences from other factors and  
308 tissue context. Protoplasts derived from *Arabidopsis* shoots were transiently transformed with  
309 constructs comprising each combination of the TFs under the control of a 35S constitutive  
310 promoter. The promoters of the tested genes, namely *LOG1*, *LOG3*, *LOG4*, *LOG5* and *LOG7*,  
311 were cloned upstream the firefly luciferase gene, that served as a readout. A construct coding  
312 for constitutively expressed Renilla luciferase was included as a normalization element. We  
313 first assayed the effect of overexpression of single TFs on the expression of each of the *LOG*  
314 genes (**Supplemental Figure S7A**). Only LHW and LL1 were able to induce *LOG3* and  
315 *LOG4* expression to moderate levels, whereas all other TFs did not. These results are overall  
316 consistent with the idea that TMO5 and LHW clade members act as obligate heterodimers  
317 (De Rybel et al., 2013; Ohashi-Ito et al., 2014). It also suggests that LHW and LL1 can  
318 activate a basal level of transcription by themselves. Overexpression of any combination of  
319 two transcription factors from the TMO5 and LHW clades was able to induce expression of  
320 the direct target genes *LOG3* and *LOG4*, but there was a clear quantitative difference with the  
321 highest induction values for all TMO5-clade combinations with LL1, and the lowest in  
322 combinations with LL2 (**Figure 7**). Besides the clear quantitative effect for *LOG3* and *LOG4*  
323 expression values, other *LOG* genes analysed were not induced (**Figure 7**), suggesting a  
324 specific regulation of *LOG3* and *LOG4* by the TMO5- and LHW-clade members or that other  
325 regulatory factors not present in protoplasts might be needed for their induction. Moreover,  
326 these experiments show that rather the LHW-clade members play a key role in defining the  
327 strength of the transcriptional activation in this simplified system, not the TMO5 clade.  
328 To further validate these results *in planta*, we inspected the *ProLOG3::n3GFP* and  
329 *ProLOG4::n3GFP* reporter lines in *lhw* and *tmo5 t511* mutant backgrounds (**Supplemental**  
330 **Figure S7 B-G**). In a control line, *ProLOG3::n3GFP* is expressed in a diarch configuration in  
331 primordia (**Supplemental Figure S7B**; white arrows), similarly to a diarch expression in root  
332 protoxylem cells (De Rybel et al., 2014). The signal of *ProLOG3::n3GFP* was still present in

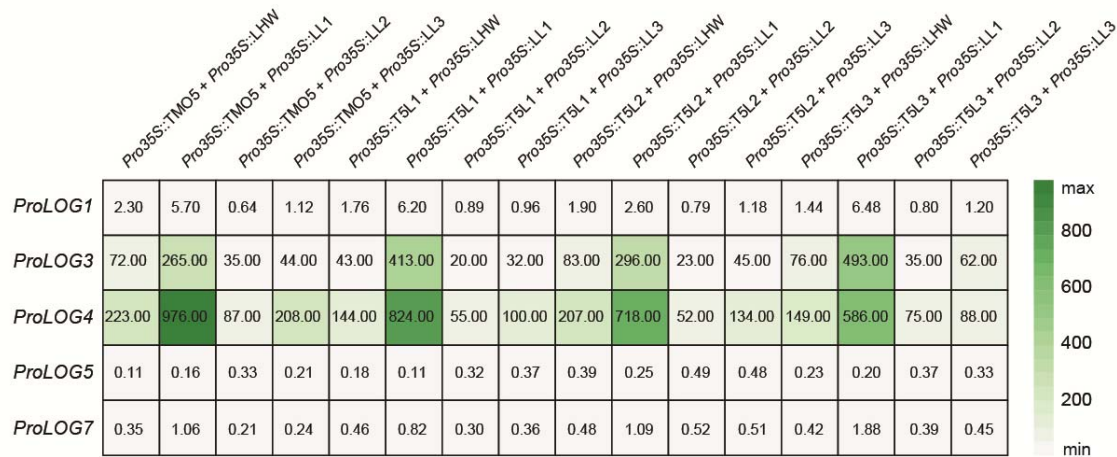

**Figure 7. Different combinations in bHLH heterodimer complexes affect target gene expression.**

Heat map shows relative changes of gene expression from LOG promoters after overexpression of combinations of TMO5 and LHW clade members' pairs in quantitative gene expression assays in Arabidopsis protoplasts. Values represent FLuc/RLuc ratios, n = 4-6.

333 the *tmo5 t5l1* double mutant (**Supplemental Figure S7C**) despite a loss of activity of two  
 334 TMO5 clade members affecting SAM phenotype (**Figure 1 C, L; Supplemental Figure S4**).  
 335 However, the expression of *ProLOG3::n3GFP* in *tmo5 t5l1* was detected only in one cell axis  
 336 compared to the control in an inspected SAM area (**Supplemental Figure S7C**; yellow  
 337 arrows) suggesting impaired vascular formation similar to the effects in the RAM (Ohashi-Ito  
 338 and Bergmann, 2007; De Rybel et al., 2013). The expression of *ProLOG4::n3GFP* in the L1  
 339 layer (**Supplemental Figure S7E**) decreased in a *tmo5 t5l1* double mutant but the overall  
 340 pattern remained the same (**Supplemental Figure S7F**). In contrast, the signal of both  
 341 *ProLOG3::n3GFP* and *ProLOG4::n3GFP* was completely missing in a *lhw* single mutant  
 342 (**Supplemental Figure S7 D, G**). Overall, these findings validate the results of the protoplast  
 343 assays showing that LHW activates *LOG3* and *LOG4* transcription together with TMO5 clade  
 344 members, and that the LHW-clade members are essential for *LOG3* and *LOG4* expression.

345

## 346 CONCLUSIONS AND DISCUSSION

347

348 Current knowledge on the regulatory complexes governing cell proliferation suggests that  
 349 plants have evolved specific networks for each of the meristem regions. Although most  
 350 known examples are comparable since they are based on a peptide-receptor interaction pair,  
 351 these are unique for one specific meristem context: CLV3-CLV1 in the SAM (Gaillochet et  
 352 al., 2015), CLE41-PXY in the vascular cambium (Fisher et al, 2007; Suer et al., 2011;  
 353 Etchells et al., 2013), and CLE40-ACR4 in the RAM (Stahl et al., 2013; Berckmans et al.,



2020). One can however question if this is accurately reflecting an evolutionary reality where each meristem region has independently evolved a dedicated regulatory network, or whether we are simply yet to uncover common regulators in these distinct regions governing cell proliferation. Our results suggest that the TMO5/LHW and T5Ls/LLs bHLH heterodimer complexes act as general regulators of cell proliferation expressed and active in all plant meristems. In this case, heterodimer variations by combinations of TMO5 and LHW subclade members resulting primarily from expression in specific domains within different meristems (and not from differential expression between meristems) provide the required specificity to adapt responses to a given developmental context. Although all homologs show overlapping expression domains in the RAM, there is more variation in expression domains in the SAM and vascular cambium areas (**Figure 3 and 4**). This highlights the fact that conservation of expression patterns in one developmental system is not necessarily copied to other contexts, further complicating extrapolation of functional studies performed in one organ to another. The obligate heterodimer nature of this interaction is likely to be of key importance here, as homodimers present in e.g. single misexpression lines (De Rybel et al., 2013) do not give the strong phenotypical effect as when both partners are overexpressed. Moreover, heterodimers are required for an efficient regulation of the well characterized target genes *LOG3* and *LOG4* (**Figure 7; Supplemental Figure S7**). Additionally, higher order mutants of each subclade, such as *tmo5 t5l1 t5l2 t5l3* and *lhw lll* mutants, yield the same phenotype (De Rybel et al., 2013). Our results however suggest that the activity of TMO5/LHW heterodimers is also further determined by specificity of the promoter regions, restricting expression of a few TMO5/LHW homologs to one or more meristems. Some TMO5/LHW combinations are thus also likely to act specifically in a given meristem.

An intriguing question emerging from our results is whether the bHLH heterodimer complexes are unique in their capacity to act as more general regulators that can be used in different developmental contexts; or whether this is a more general theme for most TFs which has simply not been uncovered so far. On one hand, one could argue for bHLH factors being unique as there are other examples of a same set of bHLH factors acting in multiple contexts. For example, the formation of trichomes and root hairs respectively depends on the bHLH proteins GL3 or EGL3, which interact with the MYB proteins WER or GL1 thus forming active transcriptional complexes used in these two developmental contexts (Bernhardt et al., 2003; Zhang et al., 2003; Zhao et al., 2008). On the other hand, as a general property, several TF families can form within-family heterodimers and TFs from a given family can interact with many other TFs from other families (Trigg et al., 2017). Thus, variations of heterodimer

388 formation of TFs from other families than bHLH could occur in different meristems through  
389 differential expression and could be regulating meristems similarly to the TMO5/LHW  
390 heterodimer. Although it might thus be evolutionary efficient for organisms to use TFs  
391 dedicated to a given tissue, combinatorial TF interactions among different families is an  
392 alternative to achieve the same level of specificity needed in each developmental context  
393 through regulation of expression patterns within and not between tissues. It is thus likely that  
394 we are yet to uncover additional functions of known TFs in other developmental contexts  
395 which could emerge by interactions with other partners.

396 Although our results suggest that TMO5/LHW heterodimers act as a common regulator  
397 controlling cell proliferation, the exact downstream mechanism might not be conserved in  
398 each of the meristem contexts. *LOG* genes are induced by all tested heterodimer complexes in  
399 a protoplast system and complexes containing LHW, and LL1 are required for their  
400 expression both in the RAM and SAM (De Rybel et al., 2014) (**Supplemental Figure S7**).  
401 This suggest that regulation of cytokinin biosynthesis could be a conserved mechanism  
402 between the different meristems. However, opposite responses on cell proliferation are  
403 observed upon misexpression in the SAM and RAM regions, which could be due to the  
404 differences in DNA binding specificity of the different heterodimers in each developmental  
405 context. It is very likely that a different set of target genes will be activated by specific  
406 heterodimer complexes leading to further functional diversification. Some indications can be  
407 found in literature as T5L1/LHW misexpression was shown to have only partly overlapping  
408 target genes compared to TMO5/LHW misexpression (De Rybel et al., 2014; Ohashi-Ito et  
409 al., 2014). However, these gene lists have been obtained using a very different experimental  
410 set-up, precluding a direct comparison. As such, additional work using a genome-wide  
411 analysis of target genes for the different heterodimer complexes would be required to evaluate  
412 the precise downstream target gene sets activated by these complexes. In summary, we show  
413 that a common bHLH heterodimer complex module controls cell proliferation in distinct plant  
414 meristems in *Arabidopsis thaliana* through heterodimer diversification leading to target gene  
415 specification.



## 417 **METHODS**

### 418 **Plant material**

419 Unless otherwise mentioned, all plant material used was *Arabidopsis thaliana*, ecotype  
420 Columbia-0. Some transgenic and mutant lines have been described previously:  
421 *ProLOG3::n3GFP* (De Rybel et al., 2014), *ProLOG4::n3GFP* (De Rybel et al., 2014),  
422 *ProRPS5A::TMO5-GR* (De Rybel et al., 2013), *ProRPS5A::TMO5-GR* x *ProRPS5A::LHW-*  
423 *GR* (Smet et al., 2019). *ProRPS5A* overexpression lines (De Rybel et al., 2013) were used to  
424 generate the crosses: F1 seeds were used for RAM analysis, each seedling was genotyped to  
425 confirm the presence of the constructs. F2 seeds from genotyped plants were used for the  
426 SAM analysis. The n3GFP-GUS reporter lines were generated by MultiSite Gateway cloning  
427 (Karimi et al., 2007) into the pMK7S\*NFm14GW,0 destination vector. All constructs were  
428 transformed into the *Arabidopsis thaliana* Col-0 background.

429 For phenotype analyses, we used the following mutant lines: *tmo5* (GK-143E03) (De Rybel et  
430 al., 2013), *t511* (RIKEN\_12-4602-1) (De Rybel et al., 2013), *t512* (GK-824H07), *t513*  
431 (SALK\_109295) (De Rybel et al., 2013), *lhw* (SALK\_023629) (De Rybel et al., 2013), *ll1*  
432 (SALK\_126132) (Ohashi-Ito et al., 2013a), *ll2* (GK-523B12), *ll3* (GK-262H03). Gene  
433 specific primers for genotyping were designed and are listed in **Supplemental Table S2**, as  
434 are insertion-specific primers. For expression analysis *in planta*, *ProLOG3::n3GFP* and  
435 *ProLOG4::n3GFP* lines were crossed into *lhw* or *tmo5 t511* mutant backgrounds.  
436 Homozygous plants were selected by PCR or antibiotic resistance as follows: final  
437 concentrations in cultivation medium of 25 mg/l kanamycin (Duchefa), 20 mg/l hygromycin  
438 (Duchefa), 10 mg/l sulfadiazine (Sigma-Aldrich). *ProLOG4::n3GFP* in *lhw* background was  
439 published previously (De Rybel et al., 2014).

440

### 441 **Cultivation conditions**

442 For root analysis, seeds were sterilized using a solution of 25% bleach and 75% ethanol. After  
443 4 days of stratification at 4°C, plants were grown in half strength Murashige and Skoog  
444 medium (Duchefa) (Murashige and Skoog, 1962) without sugar and 0.8% Plant agar under  
445 continuous light conditions at 22°C. 10 µM dexamethasone (DEX) was used for induction of  
446 expression. For lateral meristem root analysis, plants were grown in half strength Murashige  
447 and Skoog medium (Duchefa) and 0.8% plant agar under continuous light conditions for 19-  
448 20 days at 22°C. For shoot analysis, plants were cultivated in soil under long-day conditions  
449 (16 hours light/8 hours dark) in growth chambers maintained at 21-22°C, with a light intensity  
450 of approximately 150 µmol m<sup>-1</sup> s<sup>-1</sup> and 40-60% relative humidity.

#### 451 **Shoot apical meristem dissection**

452 Shoot apical meristems from inflorescence stems between 0.5 and 1.5 cm long were dissected  
453 and cultured *in vitro* for 3 hours in a cultivation chamber as described previously (Brunoud et  
454 al., 2020). The meristems were stained with a water solution of 100 µg/ml propidium iodide  
455 (Sigma-Aldrich) for 5 minutes, then washed with water and used for microscopy.

456

#### 457 **Histochemical and histological procedures**

458 For anatomical sections, 10-days-old roots were fixed overnight in 1% glutaraldehyde and 4%  
459 paraformaldehyde in 50 mM phosphate buffer, pH 7. Samples were dehydrated and embedded  
460 in Technovit 7100 resin (Heraeus Kulzer) according to the manufacturer's protocol. For  
461 proper orientation of the samples, we used a two-step embedding methodology, with a pre-  
462 embedding step to facilitate orientation in 0.5 ml Eppendorf tubes (De Smet et al., 2004).  
463 Sections of 4 µm of root, taken 0.5 cm below junction between the root and the hypocotyl  
464 were cut with a Richert Jung microtome 2040, dried on Superfrost® plus microscopic slides  
465 (Menzel-Gläser), counterstained for cell walls with 0.05% ruthenium red for 5 minutes and  
466 rinsed in water. After drying, the sections were mounted in DPX mounting medium (Sigma-  
467 Aldrich) and covered with cover slips. Images were taken with an Olympus BX53 DIC  
468 microscope. mPS-PI staining was performed as described previously (Truernit and Haseloff,  
469 2008). Briefly, the seedlings were fixed in 50% methanol and 10% acetic acid at 4°C for at  
470 least 12 hours. Samples were then rinsed with water and incubated in 1% periodic acid  
471 (Sigma-Aldrich) for 40 minutes at room temperature (22°C). After another water rinse,  
472 seedlings were incubated with Schiff's reagent (100 nM sodium metabisulphite, 0.15N 37%  
473 HCl) with fresh propidium iodide (100 µg/ml) until visibly stained. To visualize, seedlings  
474 were transferred onto microscope slides in chloral hydrate solution. Quantification of vascular  
475 cell file numbers (cells within but excluding the pericycle) were performed using ImageJ  
476 software (<https://imagej.nih.gov/ij/>). Root apical meristems of n3GFP-GUS seedlings were  
477 stained with 0.1% Calcofluor White in ClearSee solution to visualize the cell wall (Ursache et  
478 al., 2018). To visualize GFP during secondary growth, a modified ClearSee protocol (Ursache  
479 et al., 2018; Ben-Targem et al., 2021) was employed. The most upper part of the root (0.5 cm  
480 below the hypocotyl root junction) was fixed with 4% PFA (Paraformaldehyde: Sigma,  
481 P6148) and 0.01% Triton in 1x PBS for 1 hour under vacuum and embedded in 5% agarose  
482 blocks, then sections of 70-80 µm were obtained using a Vibratome (Leica VT-1000) and  
483 collected in water. Water was quickly replaced with ClearSee solution (10% xylitol 15%  
484 sodium deoxycholate, 25% urea) (Kurihara et al., 2015) and sections were kept in ClearSee

485 for 24 hours at room temperature and then stored at 4°C. Prior imaging, sections were stained  
486 with 0.05% Direct Red 23 (Sigma 212490) in ClearSee for 30 minutes, washed 3 times in  
487 ClearSee and mounted in ClearSee on a slide. Direct Red 23 stained the cell wall, and it was  
488 used to visualize cell outlay.

489

### 490 **Microscopy**

491 Confocal microscopy of shoot apical meristems was carried out using an upright Zeiss Axio  
492 Imager 2 equipped with a LSM700 confocal unit and 40x/1.0 DIC M27 water-dip objective.  
493 GFP was excited at 488 nm and detected at 490-530 nm; PI was excited at 555 nm and  
494 detected at 570-630 nm. Confocal microscopy of n3GFP-GUS root apical meristems was  
495 performed on a Leica SP8 using a 63x water-immersion objective. Calcofluor White and GFP  
496 were excited at 405 nm and 488 nm and visualized at 425-475 nm and 500-550 nm,  
497 respectively. mPS-PI-stained roots were imaged at an excitation of 514 nm and emission of  
498 600-650 nm. Confocal microscopy of root sections undergoing secondary growth was  
499 performed on a Zeiss LSM880 using a 20x dry objective and digital zoom. GFP and Direct  
500 Red 23 were excited at 488 nm and 561 nm and visualized at 490-544 nm and 580-642 nm,  
501 respectively. DIC microscopy of embedded samples was done using an Olympus BX53  
502 microscope equipped with 10x, 20x and 40x air objectives.

503

### 504 **cDNA synthesis**

505 Total RNA was prepared from 100 mg of 11-day-old seedlings with the NucleoSpin RNA  
506 Plant Kit (Macherey-Nagel) according to the manufacturer's instructions. cDNA was  
507 synthesized from 500 ng of total RNA using the SuperScript™ III Reverse Transcriptase Kit  
508 (Invitrogen).

509

### 510 **Plasmid construction**

511 DNA fragments were released by restriction from existing plasmids or amplified by PCR  
512 using primers synthesized by Sigma-Aldrich or Eurofins. The PCR reactions were performed  
513 using Q5 High-Fidelity DNA Polymerase (New England Biolabs). Gel extractions were  
514 performed using NucleoSpin Gel and PCR Clean-up Kits (Macherey-Nagel). Vectors were  
515 assembled via AQUA cloning technology (Beyer et al., 2015) and transformed into  
516 chemically competent *E. coli* strain 10-beta (New England Biolabs) or TOP10 (Invitrogen).  
517 Plasmid purifications were performed utilizing Wizard Plus SV Minipreps DNA Purification  
518 Systems (Promega). New plasmids were tested by restriction enzyme digests and sequencing

519 (Eurofins/GATC or Microsynth). All restriction enzymes were purchased from New England  
520 Biolabs. For testing promoters, the plasmid pMP010 was constructed as follows: the firefly  
521 luciferase gene (*FLuc*) was amplified by PCR from the pMZ836 plasmid (Müller et al., 2014)  
522 using the oligonucleotides oMP025 and oMP029. The product was assembled via AQUA  
523 cloning into pGEN16 (Samodelov et al., 2016) digested with SacII/XhoI. Promoter sequences  
524 of LOG genes upstream from the ATG were amplified from genomic DNA extracted from 7-  
525 day-old seedlings using primers as follows: ProLOG1 (oMP036 and oMP037, 3138 bp),  
526 ProLOG3 (oMP040 and oMP041, 3564 bp), ProLOG4 (oMP022 and oMP023, 3999 bp),  
527 ProLOG5 (oMP042 and oMP043, 3024 bp), ProLOG7 (oMP026 and oMP027, 3187 bp). The  
528 products were inserted via AQUA cloning into pMP010 digested with SacII/AgeI. For  
529 preparing vectors harbouring cDNA of transcription factors, the plasmid pMP011 was  
530 constructed as follows: the nucleotide sequence of the HA tag (YPYDVPDYA) was amplified  
531 by PCR using the oligonucleotides oMP088 and oMP089. The product was assembled via  
532 AQUA cloning into pGEN16 digested with AgeI/XhoI. Nucleotide sequences of transcription  
533 factors were amplified from cDNA prepared previously using primers as follows: cTMO5  
534 (oMP107 and oMP108), cT5L1 (oMP121 and oMP122), cT5L2 (oMP125 and oMP126),  
535 cT5L3 (oMP123 and oMP124), cLHW (oMP109 and oMP110), cLL1 (oMP131 and  
536 oMP132), cLL2 (oMP129 and oMP130), cLL3 (oMP127 and oMP128). PCR products were  
537 fused via AQUA cloning into pMP011 digested with AfeI/BstZ17I. All primers and plasmids  
538 used in this study are listed in **Supplementary Table S2** and **Supplementary Table S3**,  
539 respectively.

540

#### 541 **Luciferase protoplast assay**

542 Protoplasts were isolated from shoots of 2- to 3-week-old *Arabidopsis thaliana* plants.  
543 Flootation was employed for isolation, and plasmids were transformed using a polyethylene-  
544 glycol-mediated approach as described previously (Ochoa-Fernandez et al., 2020). Plasmids  
545 were prepared with a Wizard® Plus Midipreps DNA Purification System (Macherey-Nagel).  
546 Protoplasts were co-transformed with mixtures of the appropriate plasmids, 30 µg DNA in  
547 total. The transformed protoplasts were cultivated for 18–20 hours at 19–22°C in the dark.  
548 After incubation, protoplasts were divided into aliquots of sufficient volume to measure six  
549 technical replicates for each sample. Firefly (FLUC) and Renilla luciferase (RLuc, in  
550 GB0109, (Sarrion-Perdigones et al., 2013)) activities were simultaneously quantified in intact  
551 protoplasts as described (Ochoa-Fernandez et al., 2016). Substrates for both luciferases were  
552 added directly before measurement: D-luciferin (Biosynth AG) for FLuc, Coelenterazine

553 (Carl Roth) for RLuc. Chemiluminescence measurements were performed using a Berthold  
554 Centro XS3 LB 960 microplate luminometer (Berthold Technologies, Bad Wildbad,  
555 Germany) and a BertholdTriStar2 S LB 942 multimode plate reader (Berthold Technologies,  
556 Bad Wildbad, Germany). The FLuc/RLuc ratio was determined ( $n = 4-6$ ) and showed in  
557 tables. Constitutively expressed RLuc served as an internal normalization element to obtain  
558 ratiometric data.

559

### 560 **Quantitative analysis of shoot apical meristem**

561 Images of shoot apical meristems stained with propidium iodide were segmented using an  
562 auto seeded 3D watershed algorithm derived from the MARS pipeline (Fernandez et al.,  
563 2010) in which the parameters were manually tuned for each sample. In the resulting  
564 segmented images, cells belonging to the L1, L2 and L3 layers were automatically identified.  
565 To do so, a triangle mesh representing the tissue surface was computed using the segmented  
566 image, and L1 cells were selected as those adjacent to the background region and closest to  
567 the vertices of the surface mesh. L2 and L3 cells were selected recursively by adjacency to  
568 cells belonging to the previous layer.

569 Finally, "meristematic cells" (cells belonging to the central zone, the peripheral zone and to  
570 organ initials) were distinguished from cells of organ primordia and boundaries using the  
571 surface curvature. Principal curvatures were estimated on the surface mesh based on the  
572 vertex normal vectors (Theisel et al., 2004), and a central meristematic region was identified  
573 by thresholding the minimum principal curvature value and performing morphological  
574 operations. The retained threshold value was  $-0.005\mu\text{m}^{-1}$ . The resulting binary property was  
575 projected on the closest L1 cells to identify L1 meristematic cells, and then propagated to L2  
576 and L3 cells by adjacency with a triangle of meristematic cells at the previous layer. The  
577 results were obtained by filtering out non-meristematic cells and pooling the cell measures by  
578 cell layer.

579

### 580 **Statistical analysis**

581 All statistical analysis plots were generated using the PlotsOfData webtool at standard settings  
582 (<https://huygens.science.uva.nl/PlotsOfData/>). In all boxplots, boxes represent the 1st and 3rd  
583 quartiles, and the centre line represents the median. The lowercase letters associated with the  
584 boxplots indicate significantly different groups as determined by one-way analysis of variance  
585 (ANOVA) with post-hoc Tukey HSD testing ( $P < 0.001$ ).

586



587 **Accession Numbers**

588 The sequence data of genes described this article can be found in The Arabidopsis  
589 Information Resource (<https://www.arabidopsis.org/>) or GenBank  
590 (<http://www.ncbi.nlm.nih.gov/genbank/>) databases under the following accession numbers:  
591 *AT3G25710* for *TMO5/bHLH32*, *AT1G68810* for *T5L1/bHLH30/ABS5*, *AT3G56770* for  
592 *T5L2/bHLH107*, *AT2G41130* for *T5L3/bHLH106/STC8*, *AT2G27230* for *LHW/bHLH156*,  
593 *AT1G64625* for *LL1/LHL3/bHLH157*, *AT2G31280* for *LL2/LHL2/bHLH155*, *AT1G06150* for  
594 *LL3/LHL1/EMB1444*, *AT2G28305* for *LOG1*, *AT2G37210* for *LOG3*, *AT3G53450* for *LOG4*,  
595 *AT4G35190* for *LOG5*, and *AT5G06300* for *LOG7*.

596

597 **ACKNOWLEDGMENTS**

598

599 We would like to acknowledge the Core Facility CELLIM (supported by MEYS CR, project  
600 LM2018129 Czech-BioImaging) and Plant Sciences Core Facility of CEITEC Masaryk  
601 University as well as SFR Biosciences (UMS3444/CNRS, US8/Inserm, ENS de Lyon,  
602 UCBL) PLATIM microscopy facility for their valuable technical support. This project has  
603 received funding from the European Structural and Investment Funds, Operational  
604 Programme Research, Development and Education (project „MSCAfellow@MUNI“, number  
605 CZ.02.2.69/0.0/0.0/17\_050/0008496) to M.P, the European Research Council grant (ERC;  
606 StG TORPEDO; 714055) to E.M., the Ghent University Special Research Fund  
607 (BOF20/GOA/012) to M.M., and the DFG ( RA2950/1-2 and INST 37/965-1 FUGG) to L.R.,  
608 the German Research Foundation (DFG) under Germany’s Excellence Strategy (CEPLAS -  
609 EXC-1028 project no. 194465578 and EXC-2048/1 – Project no. 390686111), the iGRAD  
610 Plant (IRTG 1525) and NEXTPlant (Project ID 391465903/GRK 2466) to MDZ.

611

612 **AUTHOR CONTRIBUTIONS**

613 EM, MP, BDR and TV designed the research. EM performed the experiments related to RAM  
614 and vascular cambia with the help of MM and JN. LR and DR analysed root secondary  
615 growth expression pattern. MP designed and performed the experiments related to SAM,  
616 shoot phenotype and LUC assays with the help of GC, CG, JA and MDZ. EM and MP  
617 prepared figures and manuscript draft. EM, MP, BDR and TV wrote the manuscript with  
618 input from all authors.

## 619 **FIGURE LEGENDS**

### 620 **Figure 1. TMO5/LHW function is not restricted to primary root development.**

621 Cross sections of shoot apical meristems and roots undergoing secondary growth (uppermost  
622 part of the root) of 10-day-old seedlings of (A, F) wild type Col-0; (B, G) *ProRPS5A::TMO5*  
623 *x ProRPS5A::LHW*; (C, H) *tmo5 t511*; (D, I) *tmo5 t511 t513* and (E, J) *lhw lll*. (K)  
624 Determination of shoot apical meristem area and (L) cell size in L1 layer, and (M)  
625 quantification of vascular cell files (within but excluding the pericycle, red coloured area in F-  
626 J) number of root cross sections. Lowercase letters in charts indicate significantly different  
627 groups as determined using a one-way ANOVA with post-hoc Tukey HSD testing ( $p \leq 0.05$ ).  
628 Scale bars: (A-E) 20  $\mu\text{m}$ ; (F-J) 100  $\mu\text{m}$ .

629

### 630 **Figure 2. TMO5/LHW is required and sufficient for root secondary growth.**

631 Cross sections of roots undergoing secondary growth (upper most part of the root) of *tmo5*  
632 *t511 t513* and *tmo5 t511 t513* with *ProRPS5A::TMO5-GR* seedlings grown either (A, B) 5 days  
633 on medium supplemented with 10  $\mu\text{M}$  dexamethasone (DEX); (C, D) 5 days on mock  
634 medium (MS) and then transferred for additional 5 days to DEX; (E, F) 5 days on DEX and  
635 then transferred for 5 or (G, H) 10 days to MS medium. (I) Quantification shows vascular cell  
636 files number of cross sections. Lowercase letters in chart indicate significantly different  
637 groups as determined using a one-way ANOVA with post-hoc Tukey HSD testing ( $p \leq 0.05$ ).  
638 Scale bars: 100  $\mu\text{m}$ .

639

### 640 **Figure 3. TMO5 clade members show specific expression patterns in the meristems.**

641 Promoter-reporter lines were used to analyse the expression pattern of *ProTMO5*, *ProT5L1*,  
642 *ProT5L2*, and *ProT5L3* in (A-D) longitudinal sections of 5-day-old root apical meristem; (E-  
643 H) cross sections of 20-day-old roots displaying secondary growth; (I-L) shoot apical  
644 meristems. Central squares in I, K and L represent maximum intensity projection. Scale bars:  
645 (A-D) 50  $\mu\text{m}$ ; (E, F, H) 10  $\mu\text{m}$ ; (G, I-L) 20  $\mu\text{m}$ . Arrowheads indicate expression.

646

### 647 **Figure 4. LHW clade members show overlapping expressions in the meristems.**

648 Promoter-reporter lines were used to analyse the expression pattern of *ProLHW*, *ProLL1*,  
649 *ProLL2*, and *ProLL3* in (A-D) longitudinal sections of 5-day-old root apical meristem; (E-H)  
650 cross sections of 20-day-old roots displaying secondary growth; and in (I-L) shoot apical

651 meristems. Central squares in I and J represent maximum intensity projection. Scale bars: (A-  
652 D) 50  $\mu\text{m}$ ; (E-L) 20  $\mu\text{m}$ . Arrowheads indicate expression.

653

654 **Figure 5. Single mutant analysis reveals functional specificity in TMO5 and LHW clade**  
655 **members.**

656 Quantification of Col-0, *tmo5*, *t5l1*, *t5l2*, *t5l3*, *lhw*, *ll1*, *ll2* and *ll3* for vascular cell files  
657 number of cross sections (A) of root apical meristems, (B) of root undergoing secondary  
658 growth, (C) measurement of shoot apical meristem area and (D) cell size in L1 layer.  
659 Asterisks indicate endodermis. Lowercase letters in charts indicate significantly different  
660 groups as determined using a one-way ANOVA with post-hoc Tukey HSD testing ( $p \leq 0.05$ ).

661

662 **Figure 6. Variations in bHLH heterodimers show distinct phenotypic outputs.**

663 Ortho-views of z-stack confocal microscopy images of *ProRPS5A::TMO5* x  
664 *ProRPS5A::LHW*; *ProRPS5A::TMO5* x *ProRPS5A::LL1*; *ProRPS5A::TMO5* x  
665 *ProRPS5A::LL2*; *ProRPS5A::T5L1* x *ProRPS5A::LHW* and *ProRPS5A::T5L2* x  
666 *ProRPS5A::LHW* of (A-E) RAM of 5-day-old seedlings, and (F-J) shoot apical meristems.  
667 (K) Quantification of vascular cell files number of RAM, (L) measurement of shoot apical  
668 meristem area and (M) cell size in L1 layer. Lowercase letters in charts indicate significantly  
669 different groups as determined using a one-way ANOVA with post-hoc Tukey HSD testing ( $p$   
670  $\leq 0.05$ ). Scale bars: 20  $\mu\text{m}$ .

671

672 **Figure 7. Different combinations in bHLH heterodimer complexes affect target gene**  
673 **expression.** Heat map shows relative changes of gene expression from *LOG* promoters after  
674 overexpression of combinations of TMO5 and LHW clade members' pairs in quantitative  
675 gene expression assays in Arabidopsis protoplasts. Values represent FLuc/RLuc ratios, n = 4-  
676 6.

677

678 **Supplemental Figure S1. Quantification of cell number in TMO5/LHW overexpression**  
679 **line and multiple mutants.** (A) An example of a SAM surface used for quantification of  
680 SAM parameters. Cells for determination of SAM area are depicted in red. (B) Cells were  
681 counted in L1 layer of shoot apical meristems. Lowercase letters indicate significantly  
682 different groups as determined using a one-way ANOVA with post-hoc Tukey HSD testing ( $p$   
683  $\leq 0.05$ ).

684

685 **Supplemental Figure S2. Expression pattern of *ProT5L1* and *ProLL3* in shoot apical**  
686 **meristem.** Confocal microscopy images of shoot apical meristems of (A) *ProT5L1* and (B)  
687 *ProLL3* GFP-GUS reporter lines. Arrows indicate signal in deeper plant tissues. Scale bars:  
688 20  $\mu\text{m}$ .

689

690 **Supplemental Figure S3. Phenotype of single mutants reveals functional specificity in**  
691 **TMO5 and LHW clade members.**

692 Ortho-views of z-stacks confocal images of Col-0, *tmo5*, *t5l1*, *t5l2*, *t5l3*, *lhw*, *ll1*, *ll2*, *ll3* roots.  
693 (A-I) Confocal images of 5-day-old root apical meristems stained with MPs-PI, (J-O) 10-day-  
694 old root undergoing secondary growth and (P-X) shoot apical meristems. Scale bars: (A-I) 10  
695  $\mu\text{m}$ ; (J-Z) 20  $\mu\text{m}$ . (Y) Quantification of cell number in L1 layer of the shoot apical meristems.  
696 Lowercase letters indicate significantly different groups as determined using a one-way  
697 ANOVA with post-hoc Tukey HSD testing ( $p \leq 0.05$ ). Asterisks in A-I and dashed outline in  
698 J-O indicate endodermis.

699

700 **Supplemental Figure S4. Shoot phenotypes observed in the single mutants of TMO5 and**  
701 **LHW clade members.**

702 (A) Shoot phenotype of 38-day-old plants of the indicated genotypes. 50-day-old plant of *lhw*  
703 *ll1* mutant is showed in a white rectangle. Yellow and blue rectangles represent phenotypes of  
704 *tmo5* and *t5l1* single mutants, respectively, where silique appears before the last inflorescence  
705 branch. (B) Shoot phenotype of 47-day-old plants of the indicated genotypes.

706

707 **Supplemental Figure S5. Shoot, rosette, and leaf phenotypes observed in overexpression**  
708 **lines of TMO5 and LHW clade members.**

709 (A) Shoot phenotype of 36-day-old plants of the indicated genotypes. (B) Top view of rosettes  
710 of the indicated genotypes. (C) Leaf phenotype of *ProRPS5A::TMO5* x *ProRPS5A::LHW*  
711 line.

712

713 **Supplemental Figure S6. Quantification of cell number in overexpression lines of TMO5**  
714 **and LHW clade members.** Cells were counted in L1 layer of shoot apical meristems.

715 Lowercase letters indicate significantly different groups as determined using a one-way  
716 ANOVA with post-hoc Tukey HSD testing ( $p \leq 0.05$ ).

717

718 **Supplemental Figure S7. Single TMO5 and LHW clade members affect target gene**  
719 **expression differently.**

720 (A) Heat map shows relative changes of gene expression from *LOG* promoters after  
721 overexpression of combinations of single TMO5 and LHW clade members in quantitative  
722 gene expression assays in *Arabidopsis* protoplasts. Values are FLuc/RLuc ratios, n = 4-6. (B)  
723 *ProLOG3* is expressed in two cell files (white arrows) in Col-0 shoot apical meristems  
724 compared to (C) a single cell file (yellow arrows) in *tmo5 t511* double mutant and (D)  
725 undetectable expression in *lhw* mutant. (E) Signal of *ProLOG4* is (F) decreased in *tmo5 t511*  
726 double mutant and (G) missing in *lhw* mutant. Central squares in E and F represent maximum  
727 intensity projection. Scale bars: 20  $\mu$ m.

728

729 **Supplemental Table S1. Overview of all data and statistics.**

730

731 **Supplemental Table S2. List of primers used in this study.**

732

733 **Supplemental Table S3. List of plasmids used in this study.**

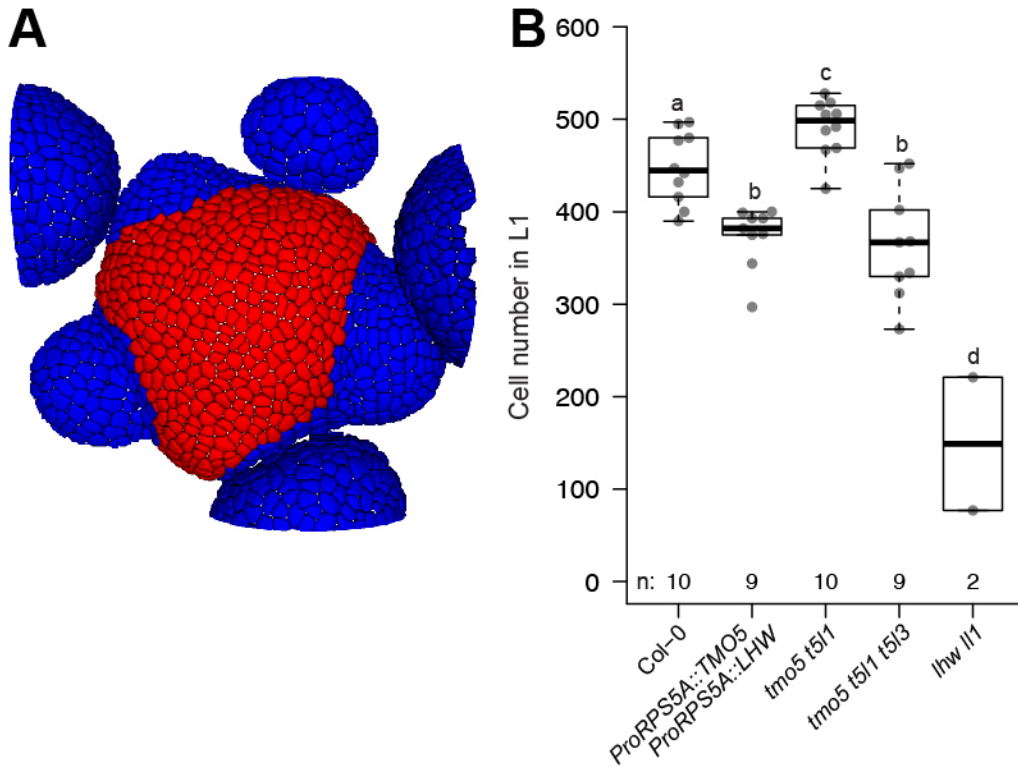

1  
2 **Supplemental Figure S1. Quantification of cell number in TMO5/LHW overexpression**  
3 **line and multiple mutants.** (A) An example of a SAM surface used for quantification of SAM  
4 parameters. Cells for determination of SAM area are depicted in red. (B) Cells were counted in  
5 L1 layer of shoot apical meristems. Lowercase letters indicate significantly different groups as  
6 determined using a one-way ANOVA with post-hoc Tukey HSD testing ( $p \leq 0.05$ ).

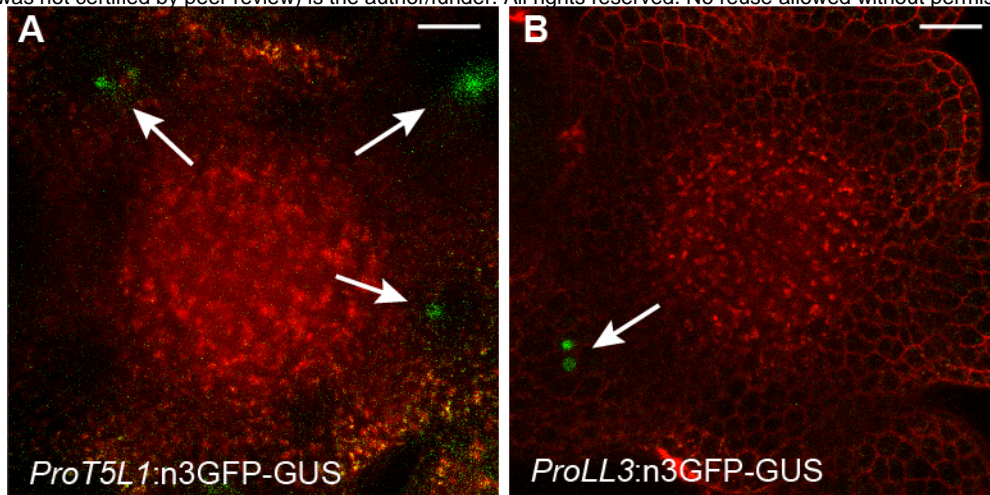

7

8 **Supplemental Figure S2. Expression pattern of *ProT5L1* and *ProLL3* in shoot apical**

9 **meristem.** Confocal microscopy images of shoot apical meristems of (A) *ProT5L1* and (B)

10 *ProLL3* GFP-GUS reporter lines. Arrows indicate signal in deeper plant tissues. Scale bars:

11 20  $\mu\text{m}$ .

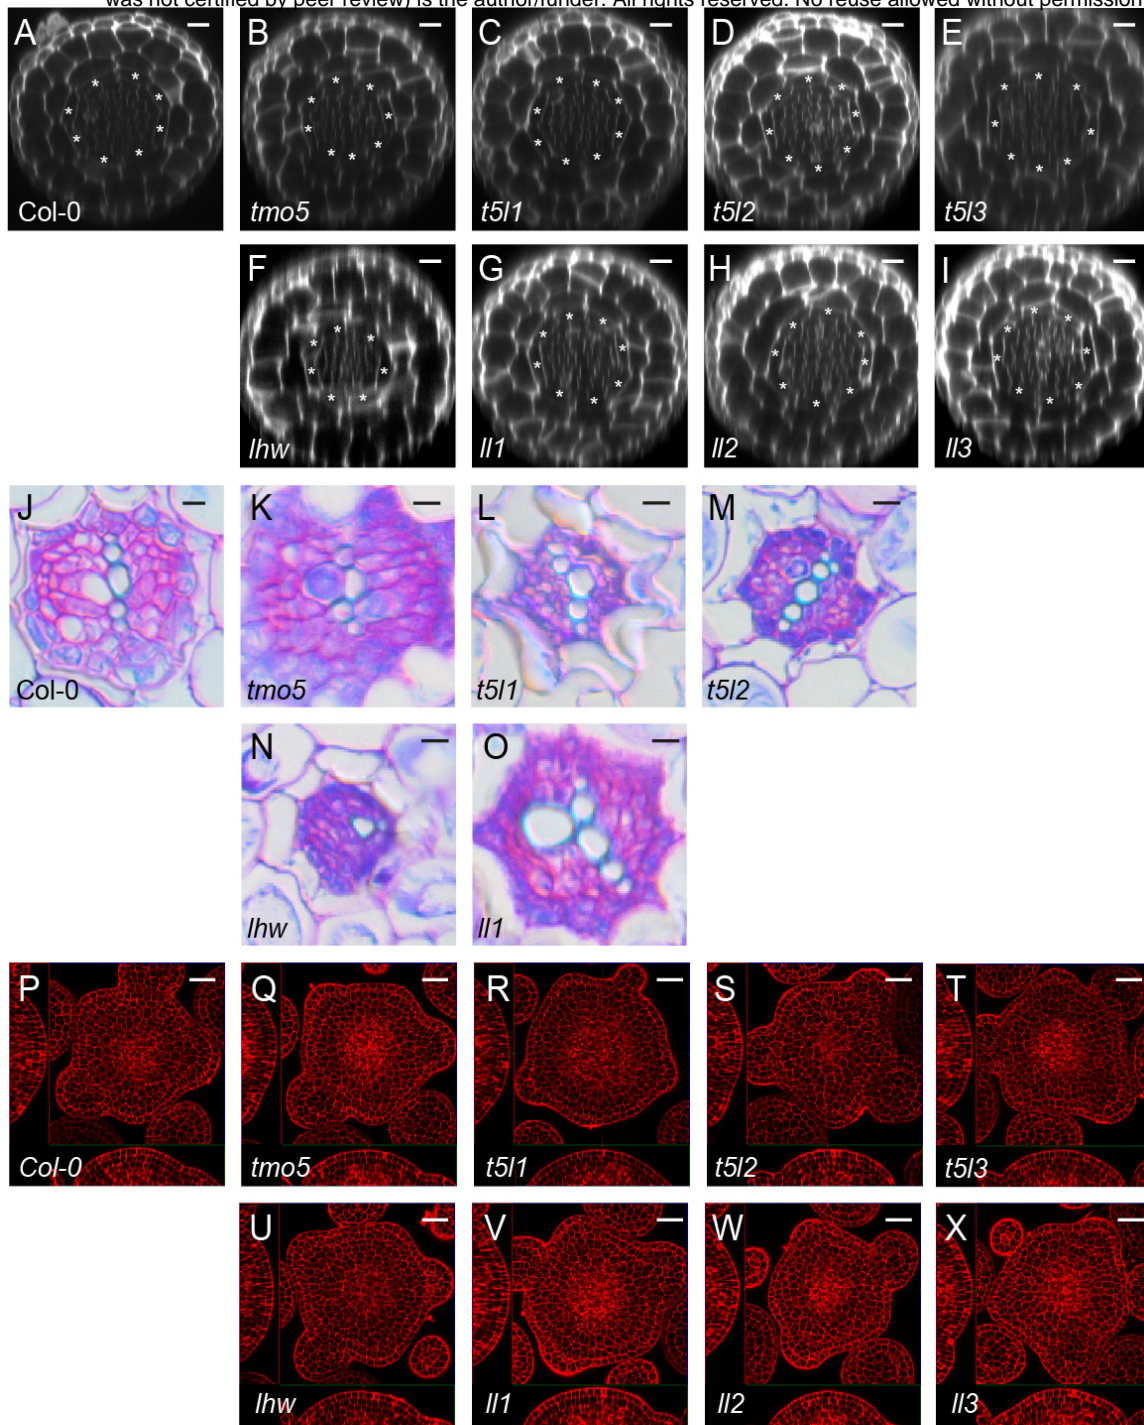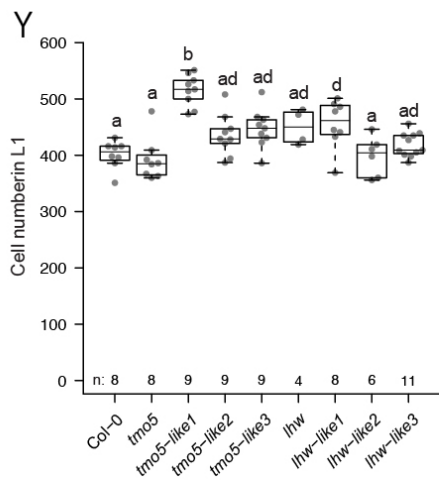



13 **Supplemental Figure S3. Phenotype of single mutants reveals functional specificity in**

14 **TMO5 and LHW clade members.**

15 Ortho-views of z-stacks confocal images of Col-0, *tmo5*, *t5l1*, *t5l2*, *t5l3*, *lhw*, *ll1*, *ll2*, *ll3* roots.

16 (A-I) Confocal images of 5-day-old root apical meristems stained with MPs-PI, (J-O) 10-day-

17 old root undergoing secondary growth and (P-X) shoot apical meristems. Scale bars: (A-I) 10

18  $\mu\text{m}$ ; (J-Z) 20  $\mu\text{m}$ . (Y) Quantification of cell number in L1 layer of the shoot apical meristems.

19 Lowercase letters indicate significantly different groups as determined using a one-way

20 ANOVA with post-hoc Tukey HSD testing ( $p \leq 0.05$ ). Asterisks in A-I and dashed outline in

21 J-O indicate endodermis.

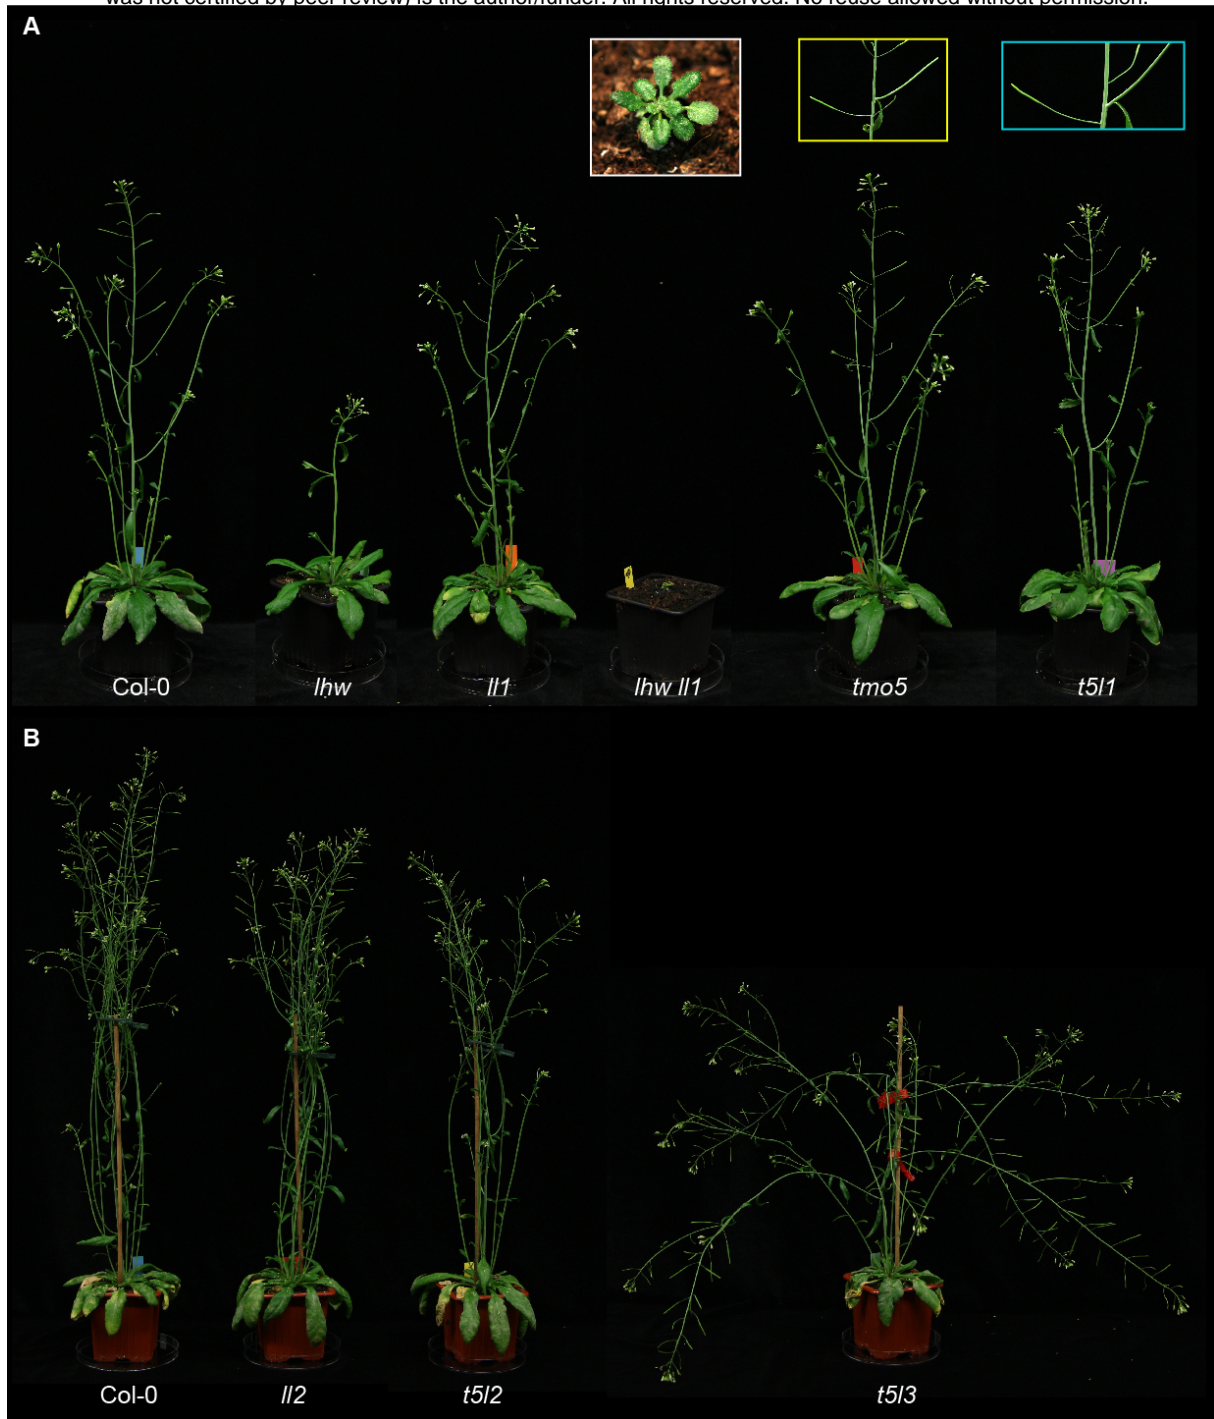

22

23 **Supplemental Figure S4. Shoot phenotypes observed in the single mutants of TMO5 and**  
24 **LHW clade members.**

25 (A) Shoot phenotype of 38-day-old plants of the indicated genotypes. 50-day-old plant of *lhw*  
26 *ll1* mutant is showed in a white rectangle. Yellow and blue rectangles represent phenotypes of  
27 *tmo5* and *t5l1* single mutants, respectively, where silique appears before the last inflorescence  
28 branch. (B) Shoot phenotype of 47-day-old plants of the indicated genotypes.

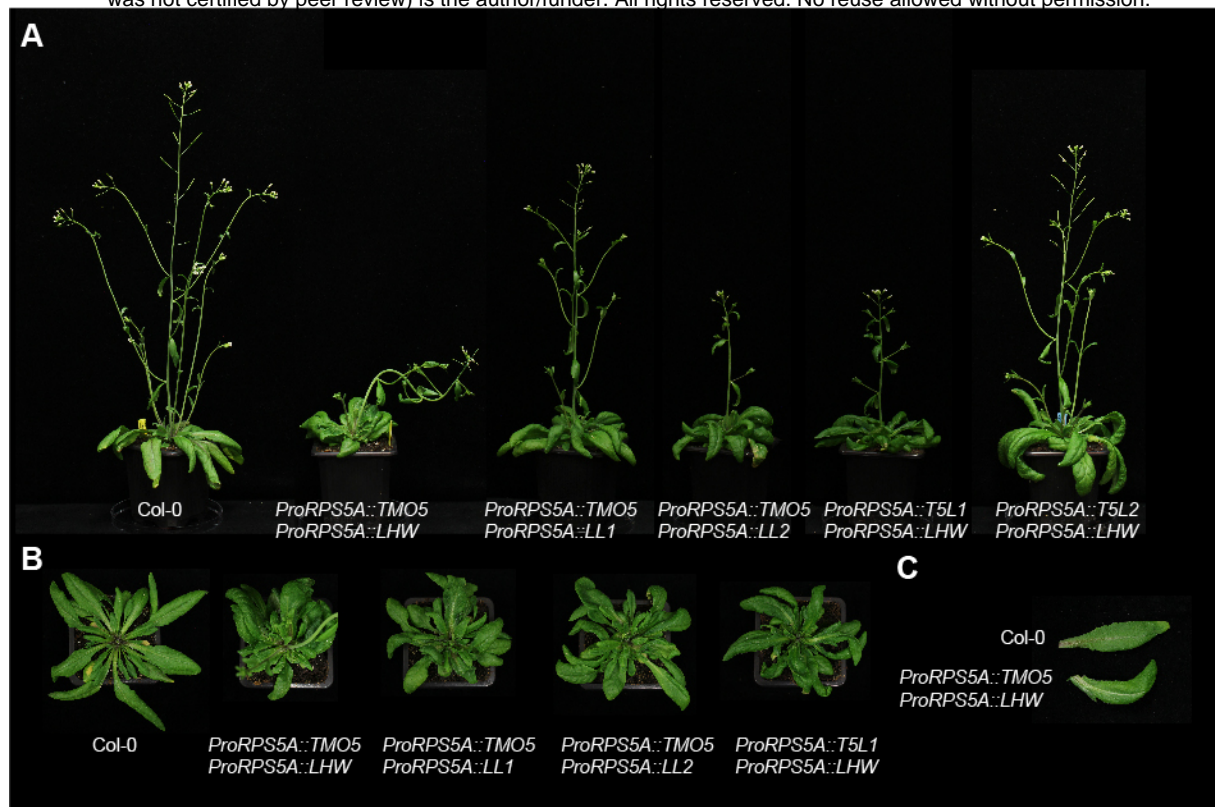

29

30 **Supplemental Figure S5. Shoot, rosette, and leaf phenotypes observed in overexpression**  
31 **lines of TMO5 and LHW clade members.**

32 (A) Shoot phenotype of 36-day-old plants of the indicated genotypes. (B) Top view of rosettes  
33 of the indicated genotypes. (C) Leaf phenotype of *ProRPS5A::TMO5* x *ProRPS5A::LHW* line.

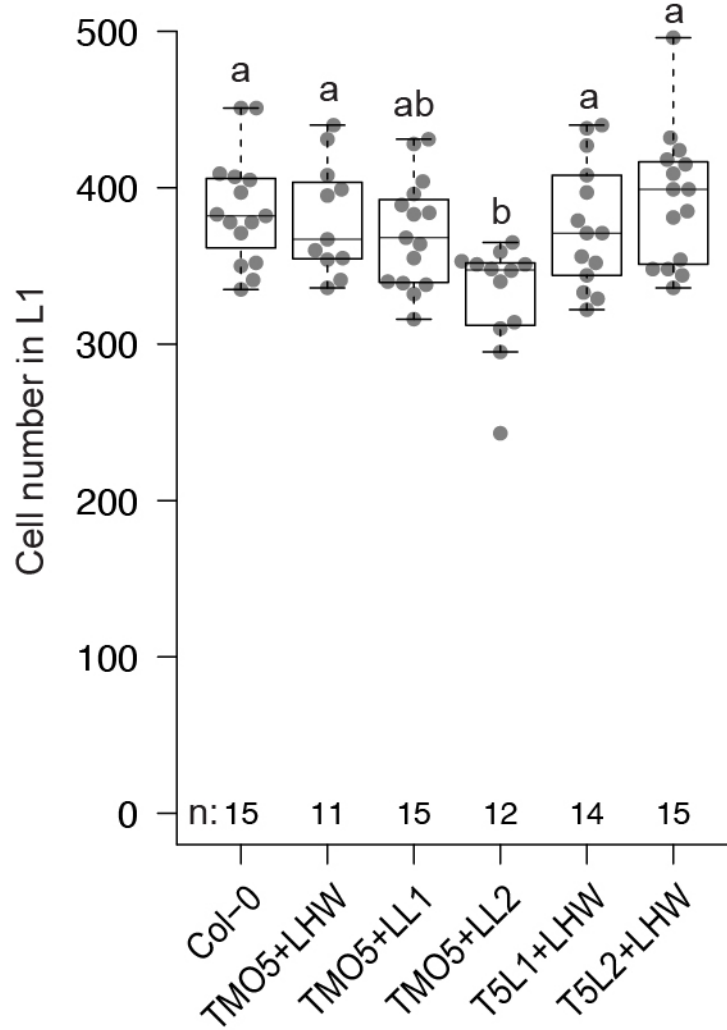

34

35 **Supplemental Figure S6. Quantification of cell number in overexpression lines of TMO5**  
36 **and LHW clade members.** Cells were counted in L1 layer of shoot apical meristems.  
37 Lowercase letters indicate significantly different groups as determined using a one-way  
38 ANOVA with post-hoc Tukey HSD testing ( $p \leq 0.05$ ).

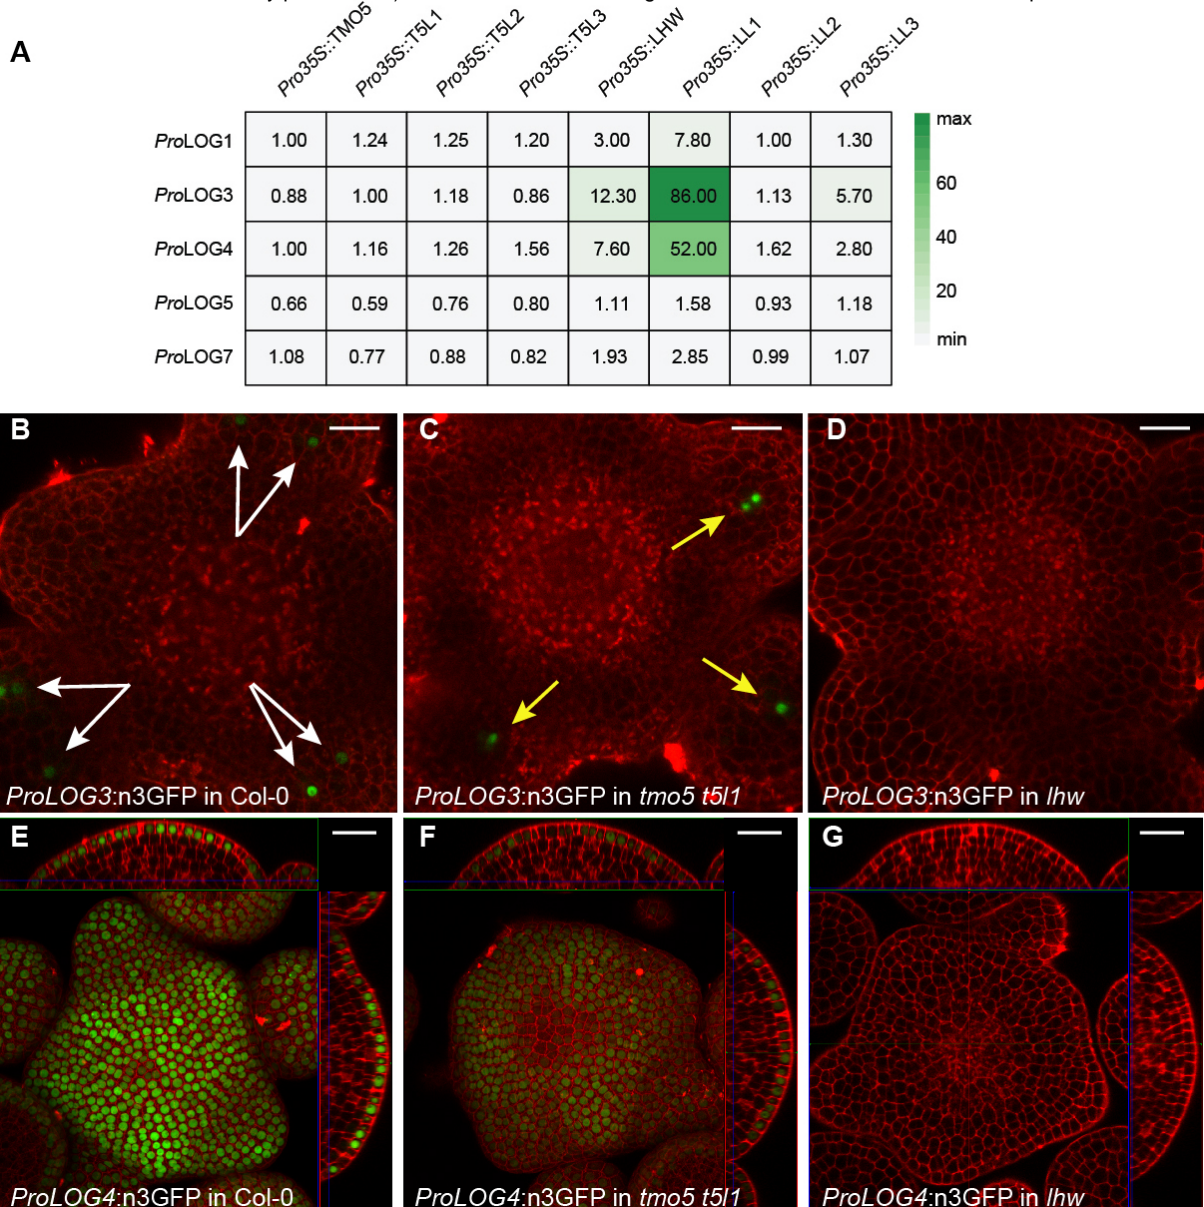

39

40 **Supplemental Figure S7. Single TMO5 and LHW clade members affect target gene**  
 41 **expression differently.**

42 (A) Heat map shows relative changes of gene expression from *LOG* promoters after  
 43 overexpression of combinations of single TMO5 and LHW clade members in quantitative gene  
 44 expression assays in *Arabidopsis* protoplasts. Values are FLuc/RLuc ratios, n = 4-6. (B)  
 45 *ProLOG3* is expressed in two cell files (white arrows) in Col-0 shoot apical meristems  
 46 compared to (C) a single cell file (yellow arrows) in *tmo5 t5l1* double mutant and (D)  
 47 undetectable expression in *lhw* mutant. (E) Signal of *ProLOG4* is (F) decreased in *tmo5 t5l1*  
 48 double mutant and (G) missing in *lhw* mutant. Central squares in E and F represent maximum  
 49 intensity projection. Scale bars: 20  $\mu$ m.

50

- 51 **Supplemental Table S1. Overview of all data and statistics.**
- 52 **Supplemental Table S2. List of primers used in this study.**
- 53 **Supplemental Table S3. List of plasmids used in this study.**

## Parsed Citations

- Ben-Targem, M., Ripper, D., Bayer, M., and Ragni, L. (2021).** Auxin and gibberellin signaling cross-talk promotes hypocotyl xylem expansion and cambium homeostasis. *Journal of Experimental Botany* 72: 3647–3660.  
Google Scholar: [Author Only](#) [Title Only](#) [Author and Title](#)
- Berckmans, B., Kirschner, G., Gerlitz, N., Stadler, R., and Simon, R. (2020).** CLE40 Signaling Regulates Root Stem Cell Fate. *Plant Physiol.* 182: 1776–1792.  
Google Scholar: [Author Only](#) [Title Only](#) [Author and Title](#)
- Bernhardt, C., Lee, M.M., Gonzalez, A., Zhang, F., Lloyd, A., and Schiefelbein, J. (2003).** The bHLH genes GLABRA3 (GL3) and ENHANCER OF GLABRA3( EGL3) specify epidermal cell fate in the Arabidopsis root. *Development* 130: 6431–6439.  
Google Scholar: [Author Only](#) [Title Only](#) [Author and Title](#)
- Beyer, H.M., Gonschorek, P., Samodelov, S.L., Meier, M., Weber, W., and Zurbriggen, M.D. (2015).** AQUA Cloning: A Versatile and Simple Enzyme-Free Cloning Approach. *PLoS One* 10: e0137652.  
Google Scholar: [Author Only](#) [Title Only](#) [Author and Title](#)
- Brunoud, G., Galvan-Ampudia, C.S., and Vernoux, T. (2020).** Methods to Visualize Auxin and Cytokinin Signaling Activity in the Shoot Apical Meristem. In *Plant Stem Cells*, M. Naseem and T. Dandekar, eds, *Methods in Molecular Biology*. (Springer US: New York, NY), pp. 79–89.  
Google Scholar: [Author Only](#) [Title Only](#) [Author and Title](#)
- Clark, S.E., Running, M.P., and Meyerowitz, E.M. (1993).** CLAVATA1, a regulator of meristem and flower development in Arabidopsis. *Development* 119: 397–418.  
Google Scholar: [Author Only](#) [Title Only](#) [Author and Title](#)
- Clark, S.E., Running, M.P., and Meyerowitz, E.M. (1995).** CLAVATA3 is a specific regulator of shoot and floral meristem development affecting the same processes as CLAVATA1. *Development* 121: 2057–2067.  
Google Scholar: [Author Only](#) [Title Only](#) [Author and Title](#)
- De Rybel, B. et al. (2014).** Integration of growth and patterning during vascular tissue formation in Arabidopsis. *Science* 345: 1255–1261.  
Google Scholar: [Author Only](#) [Title Only](#) [Author and Title](#)
- De Rybel, B., Möller, B., Yoshida, S., Grabowicz, I., Barbier de Reuille, P., Boeren, S., Smith, R.S., Borst, J.W., and Weijers, D. (2013).** A bHLH Complex Controls Embryonic Vascular Tissue Establishment and Indeterminate Growth in Arabidopsis. *Developmental Cell* 24: 426–437.  
Google Scholar: [Author Only](#) [Title Only](#) [Author and Title](#)
- De Smet, I., Chaerle, P., Vanneste, S., De Rycke, R., Inze, D., and Beeckman, T. (2004).** An easy and versatile embedding method for transverse sections. *Journal of Microscopy* 213: 76–80.  
Google Scholar: [Author Only](#) [Title Only](#) [Author and Title](#)
- Etchells, J.P., Provost, C.M., Mishra, L., and Turner, S.R. (2013).** WOX4 and WOX14 act downstream of the PXY receptor kinase to regulate plant vascular proliferation independently of any role in vascular organisation. *Development* 140: 2224–2234.  
Google Scholar: [Author Only](#) [Title Only](#) [Author and Title](#)
- Etchells, J.P. and Turner, S.R. (2010).** Orientation of vascular cell divisions in Arabidopsis. *Plant Signaling & Behavior* 5: 730–732.  
Google Scholar: [Author Only](#) [Title Only](#) [Author and Title](#)
- Fernandez, R., Das, P., Mirabet, V., Moscardi, E., Traas, J., Verdeil, J.-L., Malandain, G., and Godin, C. (2010).** Imaging plant growth in 4D: robust tissue reconstruction and lineaging at cell resolution. *Nat Methods* 7: 547–553.  
Google Scholar: [Author Only](#) [Title Only](#) [Author and Title](#)
- Fisher, K. and Turner, S. (2007).** PXY, a Receptor-like Kinase Essential for Maintaining Polarity during Plant Vascular-Tissue Development. *Current Biology* 17: 1061–1066.  
Google Scholar: [Author Only](#) [Title Only](#) [Author and Title](#)
- Gaillochet, C., Daum, G., and Lohmann, J.U. (2015).** O Cell, Where Art Thou? The mechanisms of shoot meristem patterning. *Current Opinion in Plant Biology* 23: 91–97.  
Google Scholar: [Author Only](#) [Title Only](#) [Author and Title](#)
- Grove, C.A., De Masi, F., Barrasa, M.I., Newburger, D.E., Alkema, M.J., Bulyk, M.L., and Walhout, A.J.M. (2009).** A Multiparameter Network Reveals Extensive Divergence between *C. elegans* bHLH Transcription Factors. *Cell* 138: 314–327.  
Google Scholar: [Author Only](#) [Title Only](#) [Author and Title](#)
- Hao, Y., Zong, X., Ren, P., Qian, Y., and Fu, A. (2021).** Basic Helix-Loop-Helix (bHLH) Transcription Factors Regulate a Wide Range of Functions in Arabidopsis. *IJMS* 22: 7152.  
Google Scholar: [Author Only](#) [Title Only](#) [Author and Title](#)

- Karimi, M., Depicker, A., and Hilson, P. (2007). Recombinational Cloning with Plant Gateway Vectors. *Plant Physiology* 145: 1144–1154.  
Google Scholar: [Author Only](#) [Title Only](#) [Author and Title](#)
- Kurakawa, T., Ueda, N., Maekawa, M., Kobayashi, K., Kojima, M., Nagato, Y., Sakakibara, H., and Kyojuka, J. (2007). Direct control of shoot meristem activity by a cytokinin-activating enzyme. *Nature* 445: 652–5.  
Google Scholar: [Author Only](#) [Title Only](#) [Author and Title](#)
- Kurihara, D., Mizuta, Y., Sato, Y., and Higashiyama, T. (2015). ClearSee: a rapid optical clearing reagent for whole-plant fluorescence imaging. *Development*: dev.127613.  
Google Scholar: [Author Only](#) [Title Only](#) [Author and Title](#)
- Kuroha, T., Tokunaga, H., Kojima, M., Ueda, N., Ishida, T., Nagawa, S., Fukuda, H., Sugimoto, K., and Sakakibara, H. (2009). Functional analyses of LONELY GUY cytokinin-activating enzymes reveal the importance of the direct activation pathway in *Arabidopsis*. *Plant Cell* 21: 3152–69.  
Google Scholar: [Author Only](#) [Title Only](#) [Author and Title](#)
- Laux, T., Mayer, K.F., Berger, J., and Jurgens, G. (1996). The WUSCHEL gene is required for shoot and floral meristem integrity in *Arabidopsis*. *Development* 122: 87–96.  
Google Scholar: [Author Only](#) [Title Only](#) [Author and Title](#)
- Massari, M.E. and Murre, C. (2000). Helix-Loop-Helix Proteins: Regulators of Transcription in Eucaryotic Organisms. *Mol Cell Biol* 20: 429–440.  
Google Scholar: [Author Only](#) [Title Only](#) [Author and Title](#)
- Miyashima, S. et al. (2019). Mobile PEAR transcription factors integrate positional cues to prime cambial growth. *Nature* 565: 490–494.  
Google Scholar: [Author Only](#) [Title Only](#) [Author and Title](#)
- Motte, H., Vanneste, S., and Beeckman, T. (2019). Molecular and Environmental Regulation of Root Development. *Annu. Rev. Plant Biol.* 70: 465–488.  
Google Scholar: [Author Only](#) [Title Only](#) [Author and Title](#)
- Müller, K., Siegel, D., Rodriguez Jahnke, F., Gerrer, K., Wend, S., Decker, E.L., Reski, R., Weber, W., and Zurbriggen, M.D. (2014). A red light-controlled synthetic gene expression switch for plant systems. *Mol. BioSyst.* 10: 1679–1688.  
Google Scholar: [Author Only](#) [Title Only](#) [Author and Title](#)
- Murashige, T. and Skoog, F. (1962). A Revised Medium for Rapid Growth and Bio Assays with Tobacco Tissue Cultures. *Physiol Plant* 15: 473–497.  
Google Scholar: [Author Only](#) [Title Only](#) [Author and Title](#)
- Ochoa-Fernandez, R. et al. (2020). Optogenetic control of gene expression in plants in the presence of ambient white light. *Nat Methods* 17: 717–725.  
Google Scholar: [Author Only](#) [Title Only](#) [Author and Title](#)
- Ochoa-Fernandez, R., Samodelov, S.L., Brandl, S.M., Wehinger, E., Muller, K., Weber, W., and Zurbriggen, M.D. (2016). Optogenetics in Plants: Red/Far-Red Light Control of Gene Expression. *Methods Mol Biol* 1408: 125–39.  
Google Scholar: [Author Only](#) [Title Only](#) [Author and Title](#)
- Ohashi-Ito, K. and Bergmann, D.C. (2007). Regulation of the *Arabidopsis* root vascular initial population by LONESOME HIGHWAY. *Development* 134: 2959–2968.  
Google Scholar: [Author Only](#) [Title Only](#) [Author and Title](#)
- Ohashi-Ito, K., Matsukawa, M., and Fukuda, H. (2013a). An Atypical bHLH Transcription Factor Regulates Early Xylem Development Downstream of Auxin. *Plant and Cell Physiology* 54: 398–405.  
Google Scholar: [Author Only](#) [Title Only](#) [Author and Title](#)
- Ohashi-Ito, K., Oguchi, M., Kojima, M., Sakakibara, H., and Fukuda, H. (2013b). Auxin-associated initiation of vascular cell differentiation by LONESOME HIGHWAY. *Development* 140: 765–769.  
Google Scholar: [Author Only](#) [Title Only](#) [Author and Title](#)
- Ohashi-Ito, K., Saegusa, M., Iwamoto, K., Oda, Y., Katayama, H., Kojima, M., Sakakibara, H., and Fukuda, H. (2014). A bHLH Complex Activates Vascular Cell Division via Cytokinin Action in Root Apical Meristem. *Current Biology* 24: 2053–2058.  
Google Scholar: [Author Only](#) [Title Only](#) [Author and Title](#)
- Qian, Y., Zhang, T., Yu, Y., Gou, L., Yang, J., Xu, J., and Pi, E. (2021). Regulatory Mechanisms of bHLH Transcription Factors in Plant Adaptive Responses to Various Abiotic Stresses. *Front. Plant Sci.* 12: 677611.  
Google Scholar: [Author Only](#) [Title Only](#) [Author and Title](#)
- Ragni, L. and Greb, T. (2018). Secondary growth as a determinant of plant shape and form. *Seminars in Cell & Developmental*



**Biology 79: 58–67.**

Google Scholar: [Author Only](#) [Title Only](#) [Author and Title](#)

**Samodelov, S.L., Beyer, H.M., Guo, X., Augustin, M., Jia, K.-P., Baz, L., Ebenhöf, O., Beyer, P., Weber, W., Al-Babili, S., and Zurbriggen, M.D. (2016). StrigoQuant: A genetically encoded biosensor for quantifying strigolactone activity and specificity. *Sci. Adv.* 2: e1601266.**

Google Scholar: [Author Only](#) [Title Only](#) [Author and Title](#)

**Sarrion-Perdigones, A., Vazquez-Vilar, M., Palaci, J., Castelijn, B., Forment, J., Zarsolo, P., Blanca, J., Granell, A., and Orzaez, D. (2013). GoldenBraid 2.0: A Comprehensive DNA Assembly Framework for Plant Synthetic Biology. *PLANT PHYSIOLOGY* 162: 1618–1631.**

Google Scholar: [Author Only](#) [Title Only](#) [Author and Title](#)

**Schlereth, A., Möller, B., Liu, W., Kientz, M., Flipse, J., Rademacher, E.H., Schmid, M., Jürgens, G., and Weijers, D. (2010). MONOPTEROS controls embryonic root initiation by regulating a mobile transcription factor. *Nature* 464: 913–916.**

Google Scholar: [Author Only](#) [Title Only](#) [Author and Title](#)

**Serra, O., Mähönen, A.P., Hetherington, A.J., and Ragni, L. (2022). The Making of Plant Armor: The Periderm. *Annu. Rev. Plant Biol.* 73: annurev-arplant-102720-031405.**

Google Scholar: [Author Only](#) [Title Only](#) [Author and Title](#)

**Shimotombo, A. and Scheres, B. (2019). Topology of regulatory networks that guide plant meristem activity: similarities and differences. *Current Opinion in Plant Biology* 51: 74–80.**

Google Scholar: [Author Only](#) [Title Only](#) [Author and Title](#)

**Smet, W. et al. (2019). DOF2.1 Controls Cytokinin-Dependent Vascular Cell Proliferation Downstream of TMO5/LHW. *Current Biology* 29: 520-529.e6.**

Google Scholar: [Author Only](#) [Title Only](#) [Author and Title](#)

**Stahl, Y. et al. (2013). Moderation of Arabidopsis Root Stemness by CLAVATA1 and ARABIDOPSIS CRINKLY4 Receptor Kinase Complexes. *Current Biology* 23: 362–371.**

Google Scholar: [Author Only](#) [Title Only](#) [Author and Title](#)

**Suer, S., Agusti, J., Sanchez, P., Schwarz, M., and Greb, T. (2011). WOX4 Imparts Auxin Responsiveness to Cambium Cells in Arabidopsis. *The Plant Cell* 23: 3247–3259.**

Google Scholar: [Author Only](#) [Title Only](#) [Author and Title](#)

**Theisel, H., Rossl, C., Zayer, R., and Seidel, H.-P. (2004). Normal based estimation of the curvature tensor for triangular meshes. In 12th Pacific Conference on Computer Graphics and Applications, 2004. PG 2004. Proceedings. (IEEE: Seoul, Korea), pp. 288–297.**

Google Scholar: [Author Only](#) [Title Only](#) [Author and Title](#)

**Trigg, S.A. et al. (2017). CrY2H-seq: a massively multiplexed assay for deep-coverage interactome mapping. *Nat Methods* 14: 819–825.**

Google Scholar: [Author Only](#) [Title Only](#) [Author and Title](#)

**Truernit, E. and Haseloff, J. (2008). A simple way to identify non-viable cells within living plant tissue using confocal microscopy. *Plant Methods* 4: 15.**

Google Scholar: [Author Only](#) [Title Only](#) [Author and Title](#)

**Ursache, R., Andersen, T.G., Marhavý, P., and Geldner, N. (2018). A protocol for combining fluorescent proteins with histological stains for diverse cell wall components. *Plant J* 93: 399–412.**

Google Scholar: [Author Only](#) [Title Only](#) [Author and Title](#)

**Vera-Sirera, F., De Rybel, B., Úrbez, C., Kouklas, E., Pesquera, M., Álvarez-Mahecha, J.C., Minguet, E.G., Tuominen, H., Carbonell, J., Borst, J.W., Weijers, D., and Blázquez, M.A. (2015). A bHLH-Based Feedback Loop Restricts Vascular Cell Proliferation in Plants. *Developmental Cell* 35: 432–443.**

Google Scholar: [Author Only](#) [Title Only](#) [Author and Title](#)

**Wang, B., Smith, S.M., and Li, J. (2018). Genetic Regulation of Shoot Architecture. *Annu. Rev. Plant Biol.* 69: 437–468.**

Google Scholar: [Author Only](#) [Title Only](#) [Author and Title](#)

**Yang, B. et al. (2021). Non-cell autonomous and spatiotemporal signalling from a tissue organizer orchestrates root vascular development. *Nat. Plants* 7: 1485–1494.**

Google Scholar: [Author Only](#) [Title Only](#) [Author and Title](#)

**Zhang, F., Gonzalez, A., Zhao, M., Payne, C.T., and Lloyd, A. (2003). A network of redundant bHLH proteins functions in all TTG1-dependent pathways of Arabidopsis. *Development* 130: 4859–4869.**

Google Scholar: [Author Only](#) [Title Only](#) [Author and Title](#)

**Zhao, M., Morohashi, K., Hatlestad, G., Grotewold, E., and Lloyd, A (2008). The TTG1-bHLH-MYB complex controls trichome cell fate and patterning through direct targeting of regulatory loci. *Development* 135: 1991–1999.**

Google Scholar: [Author Only](#) [Title Only](#) [Author and Title](#)
